# Supplementary material for: Screening of Small-Molecule Libraries Using SARS-CoV-2-Derived Sequences Identifies Novel Furin Inhibitors
Source: MDPI journal article supplement (doi:10.3390/ijms25105079), 2024-05-07
Supplement: s1 [file s1]

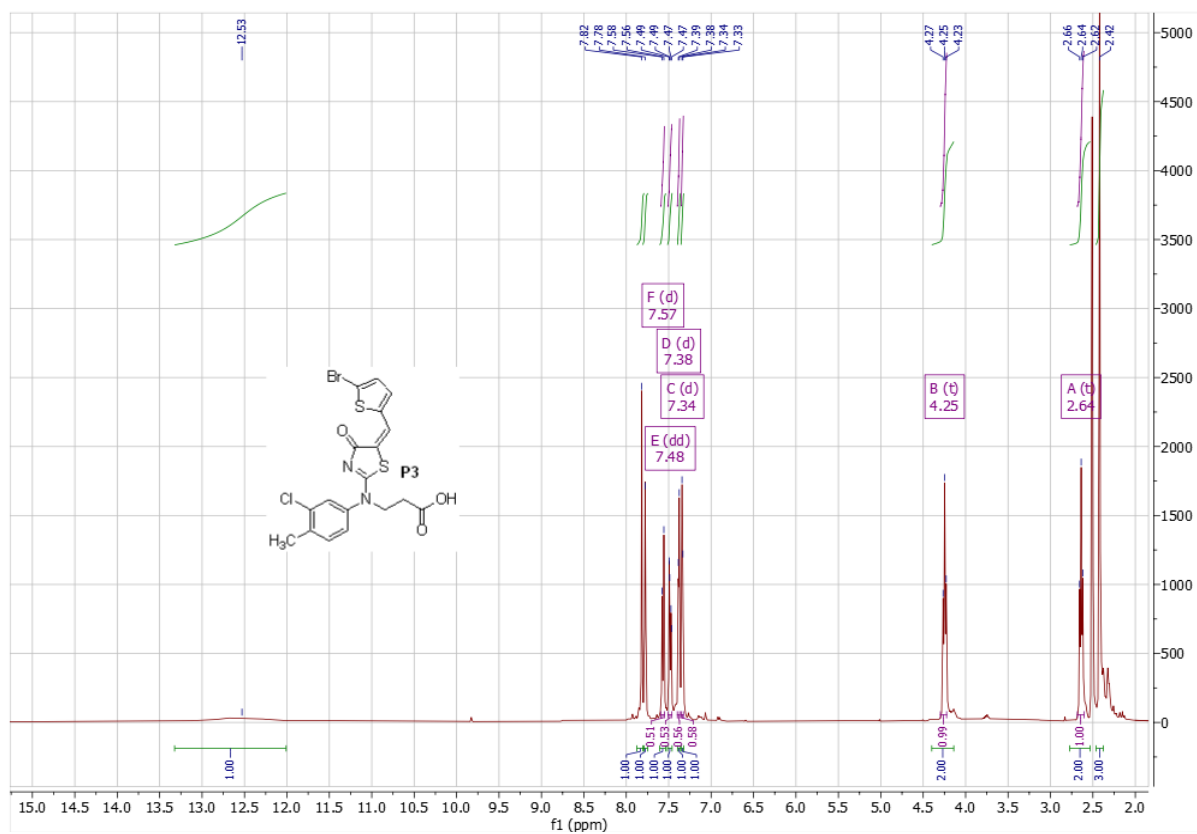

**Figure S1** <sup>1</sup>H NMR spectrum of compound **P3**

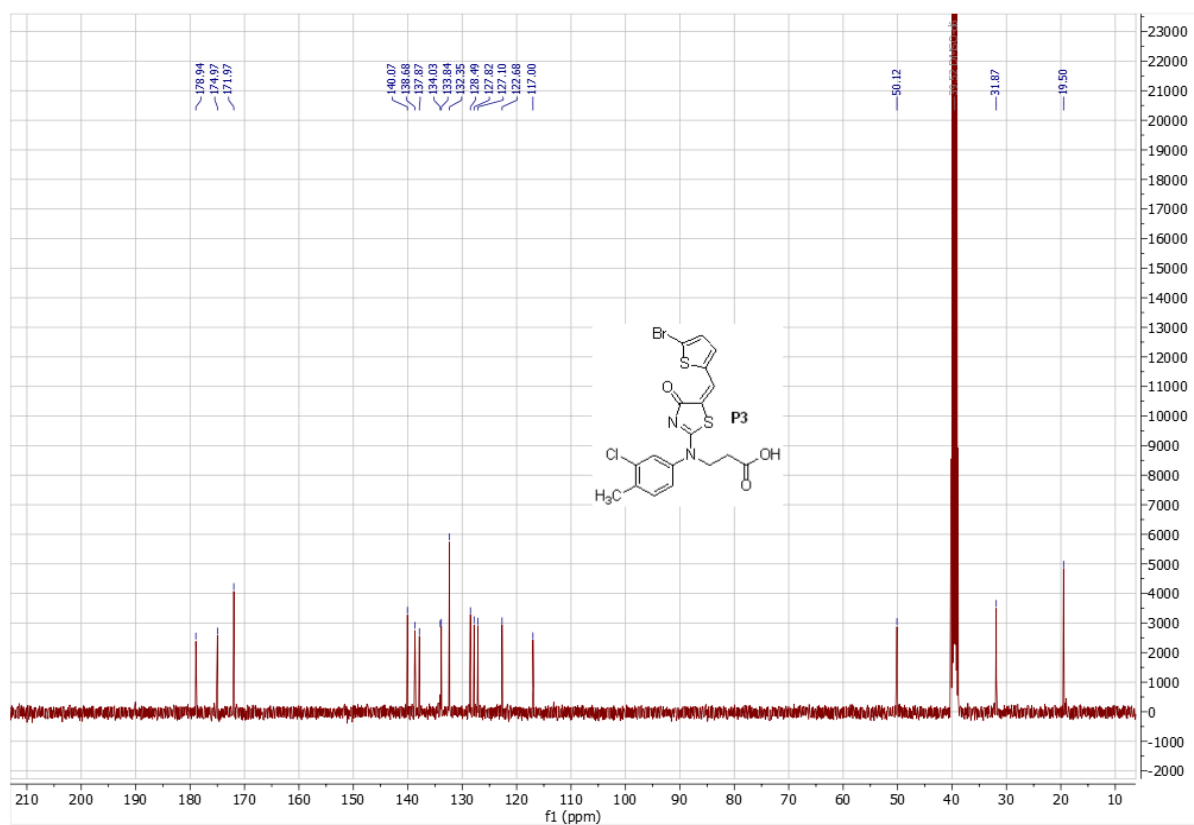

**Figure S2**  $^{13}\text{C}$  NMR spectrum of compound **P3**

E:\Duomenys\KTU\20240410\P3.d Injection 1 ESI (+) MS centroid MS + spectrum 0.89 - 0.58

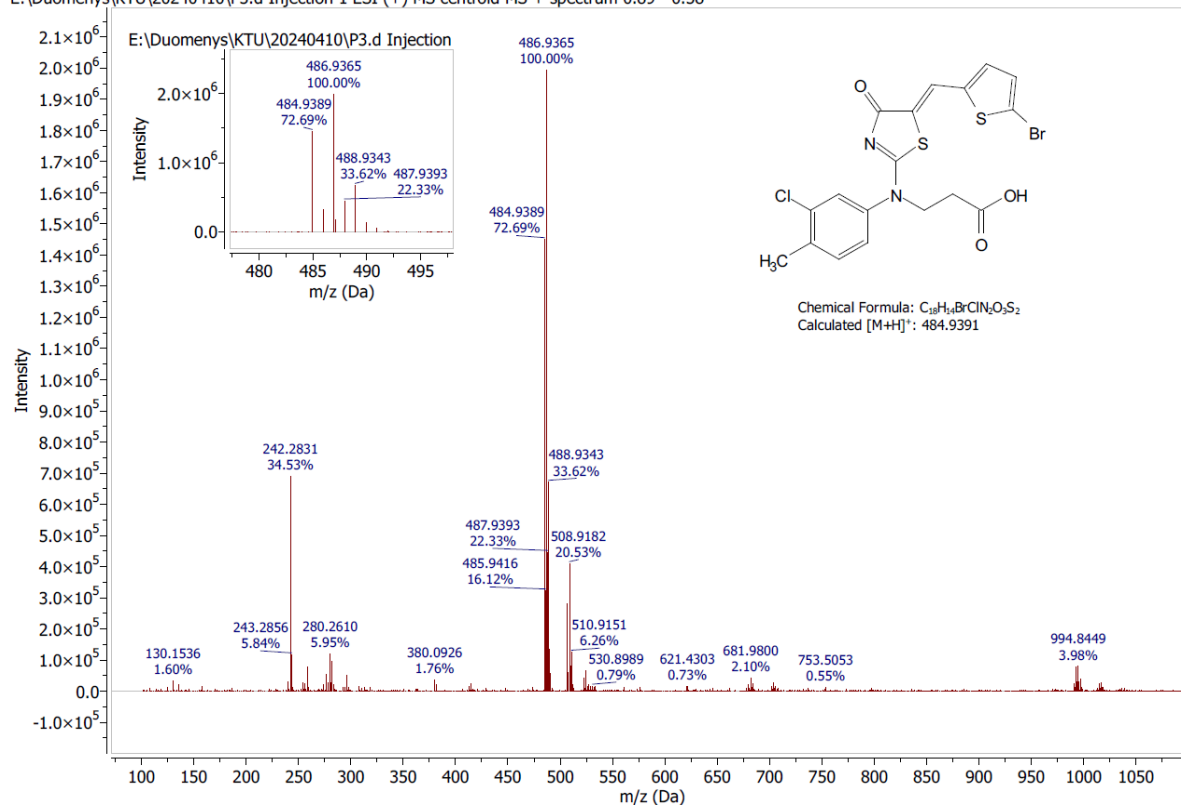

**Figure S3** Mass spectrum of compound **P3**

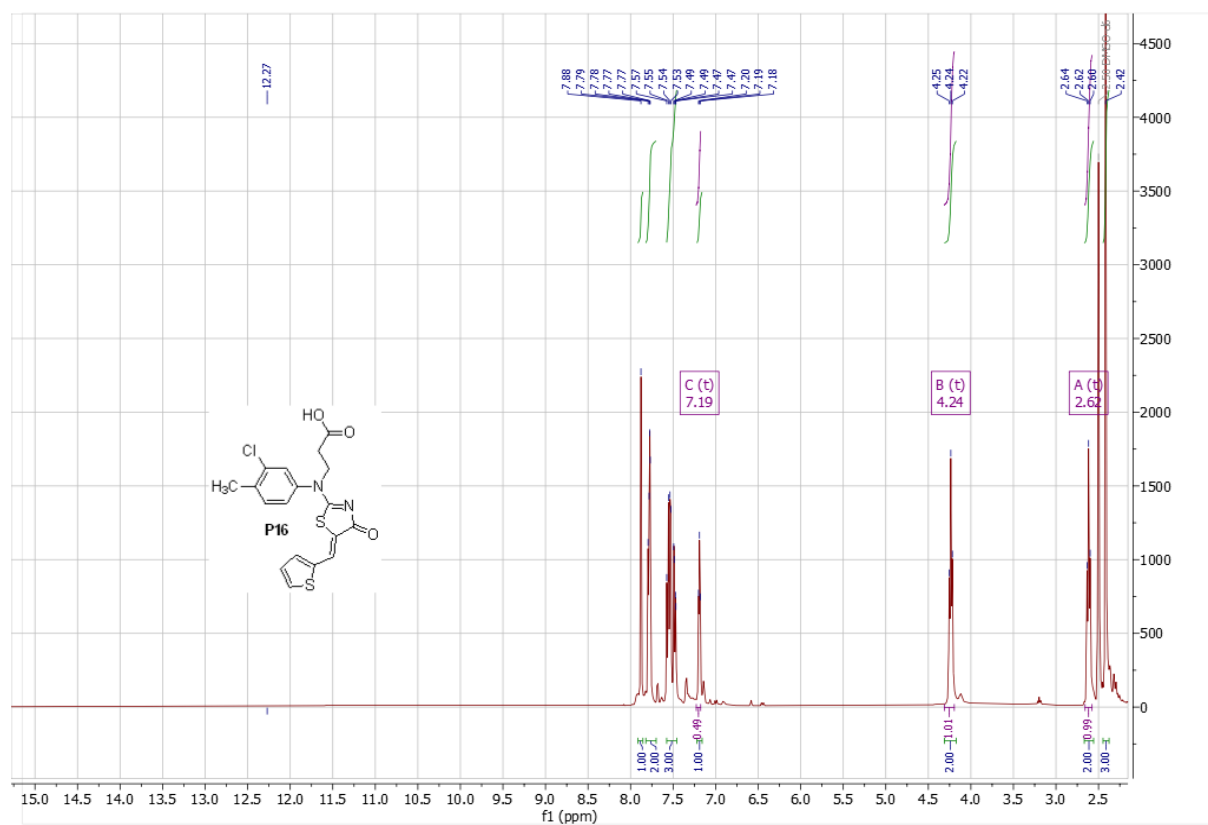

**Figure S4** <sup>1</sup>H NMR spectrum of compound **P16**

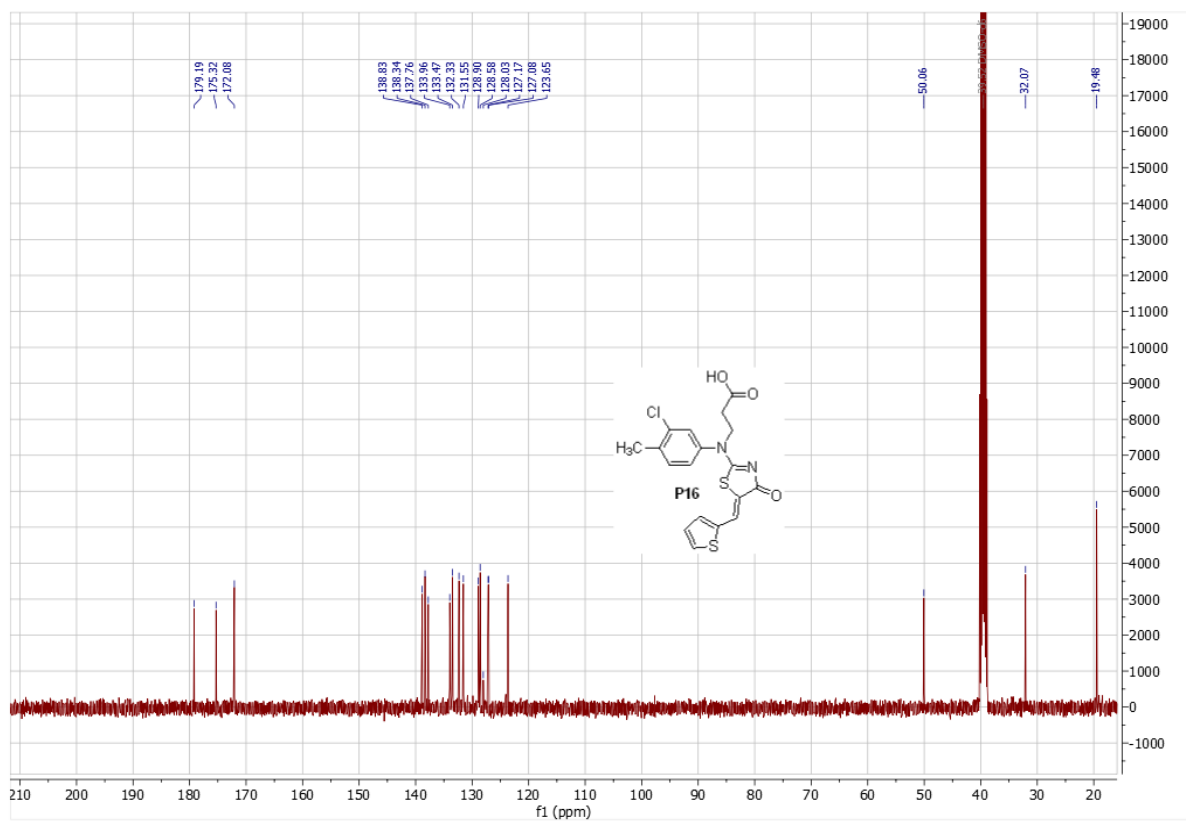

**Figure S5**  $^{13}\text{C}$  NMR spectrum of compound **P16**

E:\Duomenys\KTU\20240410\P16.d Injection 1 ESI (+) MS centroid MS + spectrum 0.85 - 0.58

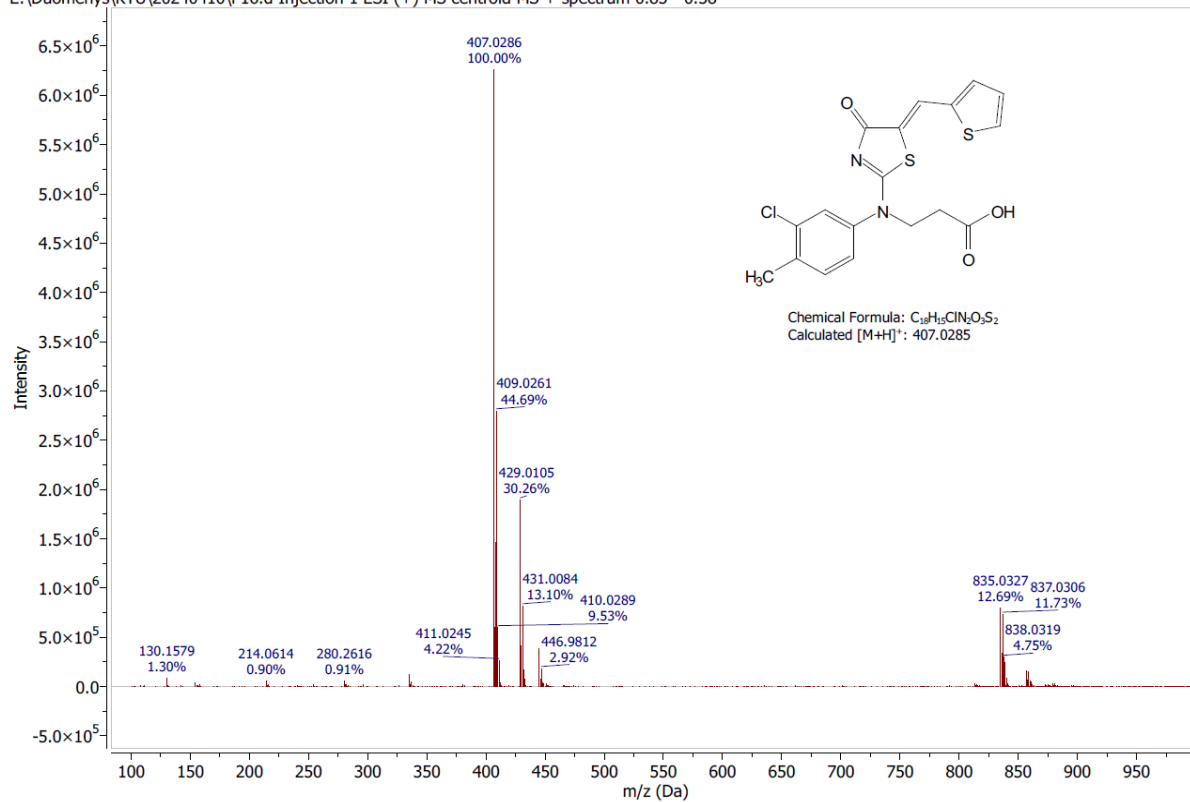

**Figure S6** Mass spectrum of compound **P16**

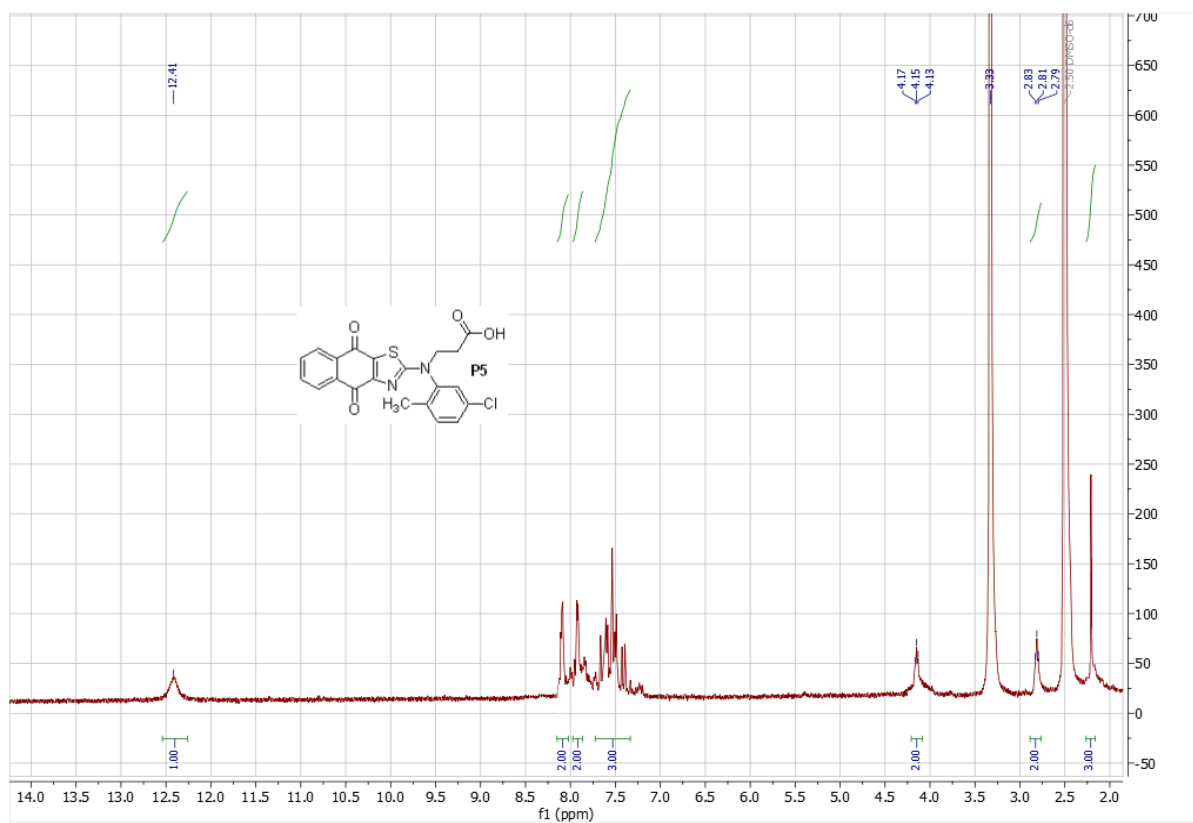

**Figure S7**  $^1\text{H}$  NMR spectrum of compound **P5**

E:\Duomenys\KTU\20240410\P5\_2.d Injection 1 ESI (+) MS centroid MS + spectrum 0.85 - 0.58

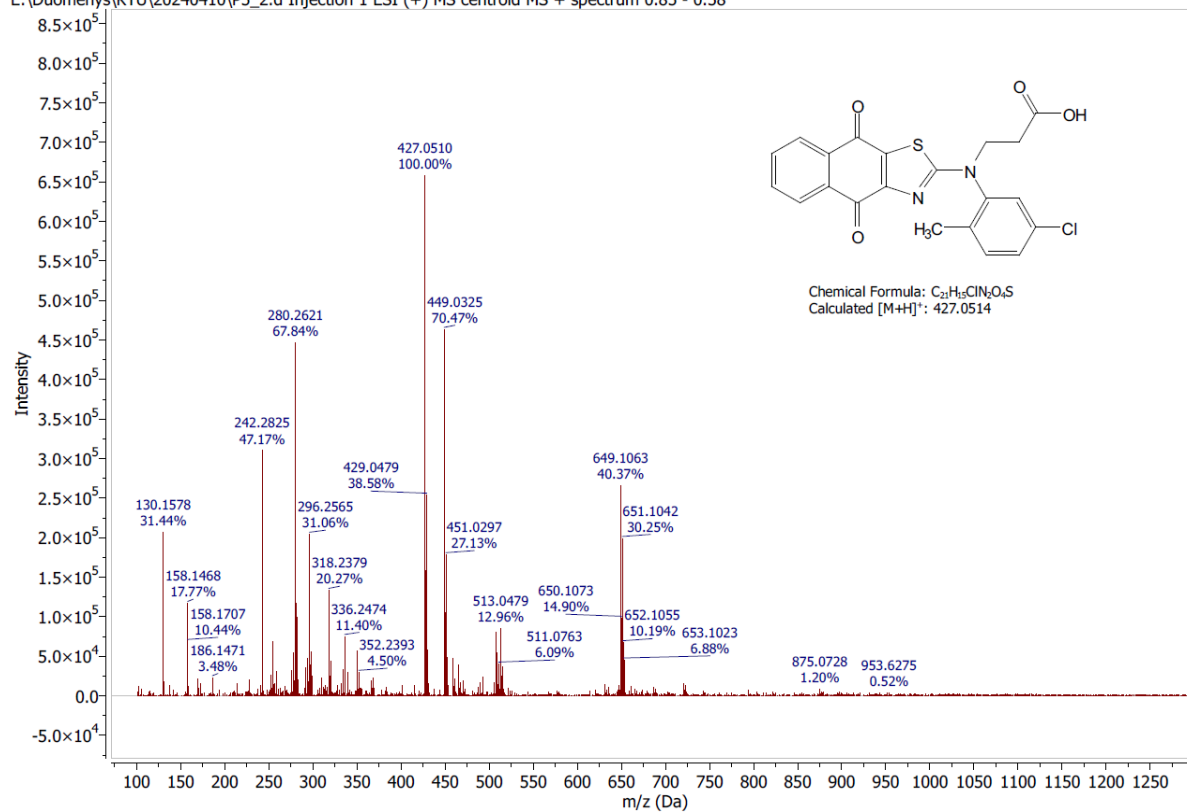

**Figure S8** Mass spectrum of compound **P5**



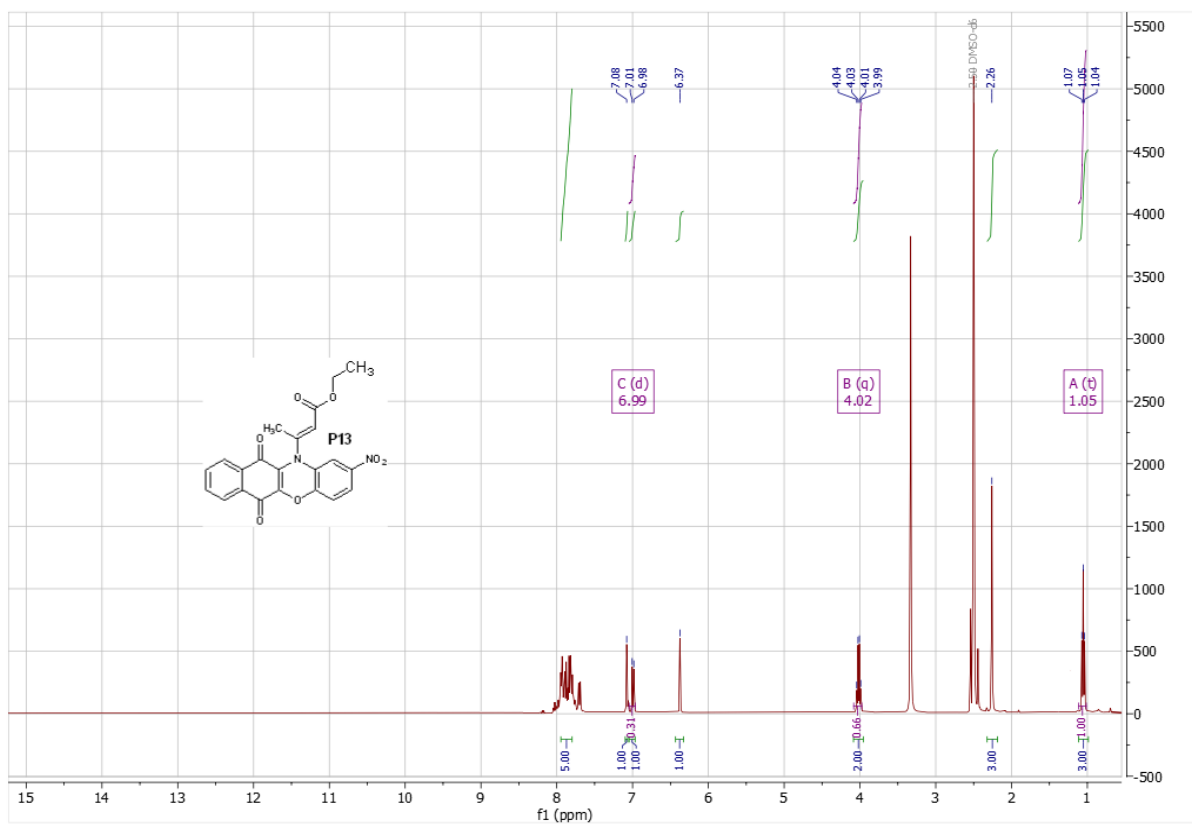

**Figure S9**  $^1\text{H}$  NMR spectrum of compound **P13**

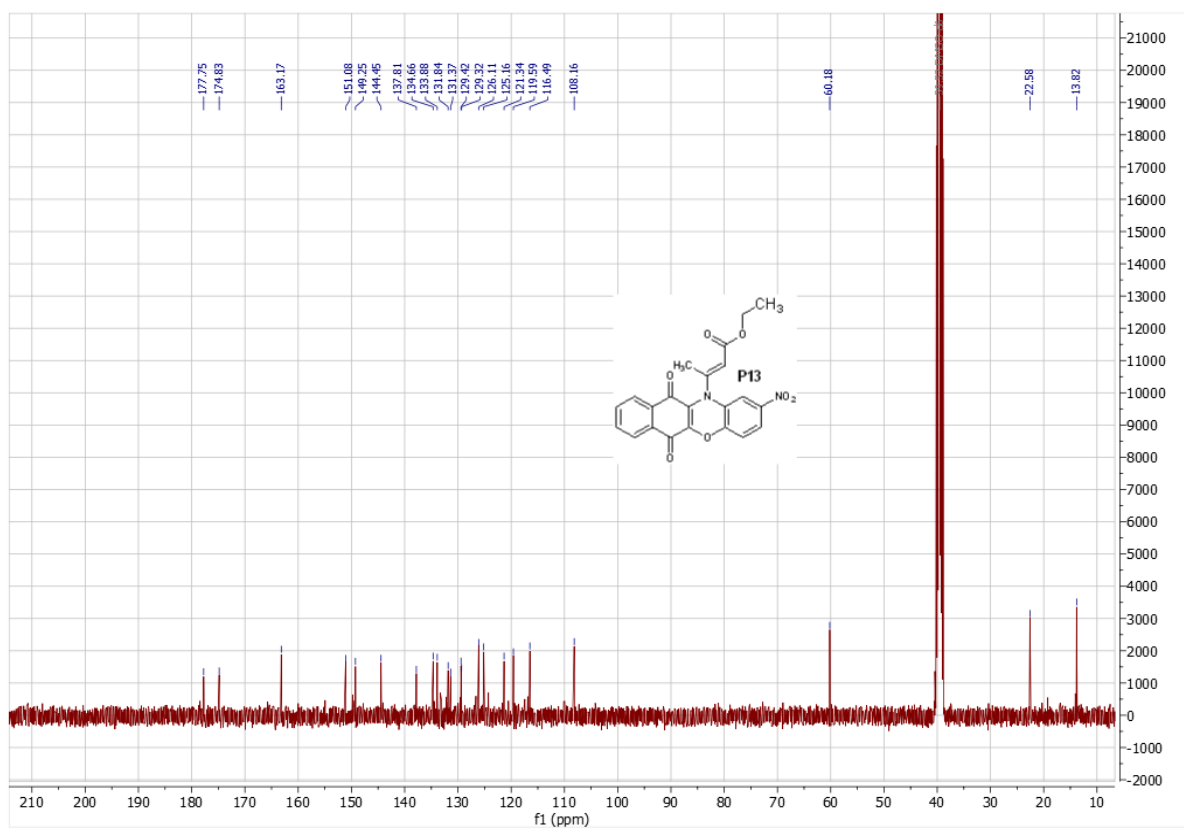

**Figure S10** <sup>13</sup>C NMR spectrum of compound **P13**

E:\Duomenys\KTU\20240410\P13.d Injection 1 ESI (+) MS centroid MS + spectrum 0.88 - 1.18

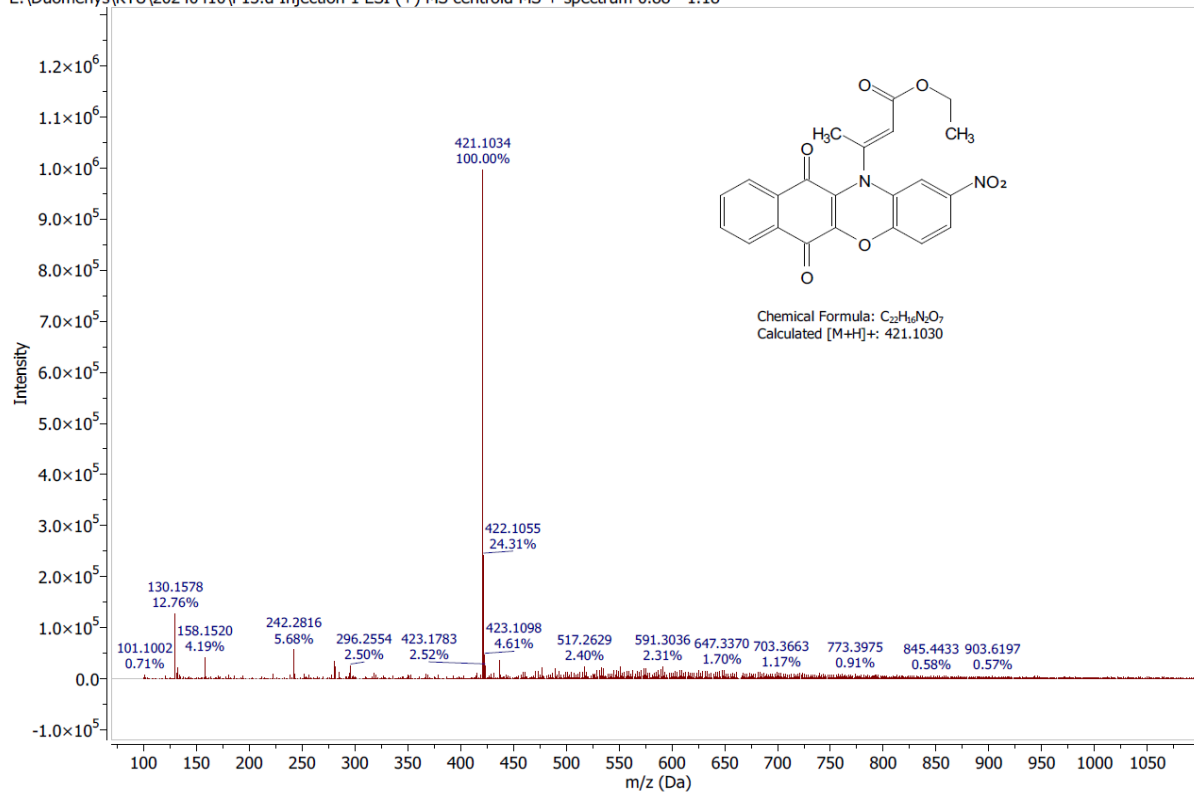

**Figure S11** Mass spectrum of compound **P13**
