# Supplementary material for: Screening of Small-Molecule Libraries Using SARS-CoV-2-Derived Sequences Identifies Novel Furin Inhibitors
Source: MDPI journal article supplement (doi:10.3390/ijms25105079), 2024-05-07
Supplement: s1 [file s1]

**Table S3.** Plastic items used in the current work and registered in our Green Book (GB)

| <b>Object</b>                 | <b>Quantity</b> | <b>Unit weight<br/>[g]</b> | <b>TOT weight<br/>[g]</b> |
|-------------------------------|-----------------|----------------------------|---------------------------|
| Flask (75cm <sup>2</sup> )    | 7               | 60,00                      | 420,00                    |
| Plate (24 well)               | 5               | 65,40                      | 327,00                    |
| Plate (48 well)               | 5               | 56,00                      | 280,00                    |
| Plate (96 well)               | 40              | 64,60                      | 2584,00                   |
| Sterile pipette (10mL)        | 50              | 14,00                      | 700,00                    |
| Sterile pipette (25mL)        | 25              | 15,60                      | 390,00                    |
| Optical clear adhesive sheets | 30              | 2,00                       | 60,00                     |
| Sterile pipette (5mL)         | 40              | 7,90                       | 316,00                    |
| Tips (10 µL)                  | 6000            | 0,12                       | 720,00                    |
| Tips (1000 µL)                | 500             | 0,76                       | 380,00                    |
| Tips (200 µL)                 | 6000            | 0,27                       | 1620,00                   |
| Tube (0,5 mL)                 | 500             | 0,48                       | 240,00                    |
| Tube (1,5 mL)                 | 700             | 1,00                       | 700,00                    |
| Tube (15 mL)                  | 10              | 6,40                       | 64,00                     |
| Tube (50 mL)                  | 50              | 12,70                      | 635,00                    |
| Glove pairs                   | 200             | 6,20                       | 1240,00                   |
| Other                         |                 |                            | 1000,0                    |
|                               |                 | <b>TOT</b>                 | <b>11676,00</b>           |
