# Supplementary material for: Screening of Small-Molecule Libraries Using SARS-CoV-2-Derived Sequences Identifies Novel Furin Inhibitors
Source: Int J Mol Sci. 2024 May 7;25(10):5079. doi: 10.3390/ijms25105079 (PMC11121672; doi:10.3390/ijms25105079)
Supplement: Supplementary file 1 [file ijms-25-05079-s001.zip]

Archive with 4 entries (4 files):
- ijms-2957185-supplementary figures.pdf
- Table S1.xlsx
- Table S2.xlsx
- Table S3.pdf
