# Supplementary material for: Screening of Small-Molecule Libraries Using SARS-CoV-2-Derived Sequences Identifies Novel Furin Inhibitors
Source: Int J Mol Sci. 2024 May 7;25(10):5079. doi: 10.3390/ijms25105079 (PMC11121672; doi:10.3390/ijms25105079)
Supplement: Supplementary file 1 [file ijms-25-05079-s001.zip › Table S1.xlsx]

## Sheet: Plate formats
	Solvent:	DMSO		Storage	-80						Conc:	30-170 mM						Vf plate	20	ul
	volume	20 uL																Cf plate	30-170	uM
																		Vi Dil	1 ul
	PL-1																	C Dil	0,6-3,4	mM
	1	2	3	4	5	6	7	8	9	10	11	12						V dil	50	uL	(1/50)
A	NO 1	NO 9	NO 17	NO 25	NO 33	NO 41	NO 49	NO 57	NO 65	NO 73	NO 81	NO 89						V conc	1	uL
B	NO 2	NO 10	NO 18	NO 26	NO 34	NO 42	NO 50	NO 58	NO 66	NO 74	NO 82	NO 90
C	NO 3	NO 11	NO 19	NO 27	NO 35	NO 43	NO 51	NO 59	NO 67	NO 75	NO 83	NO 91
D	NO 4	NO 12	NO 20	NO 28	NO 36	NO 44	NO 52	NO 60	NO 68	NO 76	NO 84	NO 92
E	NO 5	NO 13	NO 21	NO 29	NO 37	NO 45	NO 53	NO 61	NO 69	NO 77	NO 85	NO 93
F	NO 6	NO 14	NO 22	NO 30	NO 38	NO 46	NO 54	NO 62	NO 70	NO 78	NO 86	NO 94
G	NO 7	NO 15	NO 23	NO 31	NO 39	NO 47	NO 55	NO 63	NO 71	NO 79	NO 87	NO 95
H	NO 8	NO 16	NO 24	NO 32	NO 40	NO 48	NO 56	NO 64	NO 72	NO 80	NO 88	NO 96
	PL-2
	1	2	3	4	5	6	7	8	9	10	11	12
A	NO 97	NO 105	NO 113	NO 121	NO 129	NO 137	NO 145	NO 153	NO 161	NO 169	NO 177	NO 185
B	NO 98	NO 106	NO 114	NO 122	NO 130	NO 138	NO 146	NO 154	NO 162	NO 170	NO 178	NO 186
C	NO 99	NO 107	NO 115	NO 123	NO 131	NO 139	NO 147	NO 155	NO 163	NO 171	NO 179	NO 187
D	NO 100	NO 108	NO 116	NO 124	NO 132	NO 140	NO 148	NO 156	NO 164	NO 172	NO 180	NO 188
E	NO 101	NO 109	NO 117	NO 125	NO 133	NO 141	NO 149	NO 157	NO 165	NO 173	NO 181	NO 189
F	NO 102	NO 110	NO 118	NO 126	NO 134	NO 142	NO 150	NO 158	NO 166	NO 174	NO 182	NO 190
G	NO 103	NO 111	NO 119	NO 127	NO 135	NO 143	NO 151	NO 159	NO 167	NO 175	NO 183	NO 191
H	NO 104	NO 112	NO 120	NO 128	NO 136	NO 144	NO 152	NO 160	NO 168	NO 176	NO 184	NO 192
	PL-3
	1	2	3	4	5	6	7	8	9	10	11	12
A	NO 193	NO 201	NO 209	NO 217	NO 225	NO 233	NO 241	NO 249	NO 257	NO 267	NO 275	NO 283
B	NO 194	NO 202	NO 210	NO 218	NO 226	NO 234	NO 242	NO 250	NO 258	NO 268	NO 276	NO 284
C	NO 195	NO 203	NO 211	NO 219	NO 227	NO 235	NO 243	NO 251	NO 259	NO 269	NO 277	NO 285
D	NO 196	NO 204	NO 212	NO 220	NO 228	NO 236	NO 244	NO 252	NO 261	NO 270	NO 278	NO 286
E	NO 197	NO 205	NO 213	NO 221	NO 229	NO 237	NO 245	NO 253	NO 263	NO 271	NO 279	NO 287
F	NO 198	NO 206	NO 214	NO 222	NO 230	NO 238	NO 246	NO 254	NO 264	NO 272	NO 280	NO 288
G	NO 199	NO 207	NO 215	NO 223	NO 231	NO 239	NO 247	NO 255	NO 265	NO 273	NO 281	NO 289
H	NO 200	NO 208	NO 216	NO 224	NO 232	NO 240	NO 248	NO 256	NO 266	NO 274	NO 282	NO 290
	BG-SZ PL
	1	2	3	4	5	6	7	8	9	10	11	12
A	B NO 1	B NO 9	B NO 17	B NO 25
B	B NO 2	B NO 10	B NO 18	B NO 26
C	B NO 3	B NO 11	B NO 19	B NO 27
D	B NO 4	B NO 12	B NO 20	B NO 28
E	B NO 5	B NO 13	B NO 21	B NO 29
F	B NO 6	B NO 14	B NO 22	B NO 30
G	B NO 7	B NO 15	B NO 23	DMSO
H	B NO 8	B NO 16	B NO 24	DMSO

## Sheet: Compound ID 141-290
NO ID	ID in collection	Molar mass	Solvent	Concentration				Name
141	68	280.24	DMSO	25	mg/ml	89.2092	mM	1-(2-methoxy-5-nitrophenyl)-5-oxopyrrolidine-3-carboxylic acid	Conc min	41.0293	mM
142	69	224.22	DMSO	25	mg/ml	111.498	mM	3-((2-methyl-4-nitrophenyl)amino)propanoic acid	Conc Max	165.388	mM
143	70	291.35	DMSO	25	mg/ml	85.8074	mM	4-(1H-benzo[d]imidazol-2-yl)-1-(m-tolyl)pyrrolidin-2-one
144	71	264.24	DMSO	25	mg/ml	94.611	mM	1-(2-methyl-5-nitrophenyl)-5-oxopyrrolidine-3-carboxylic acid	Conc Media	89.2152	mM
145	72	311.77	DMSO	25	mg/ml	80.1873	mM	4-(1H-benzo[d]imidazol-2-yl)-1-(4-chlorophenyl)pyrrolidin-2-one
146	73	325.8	DMSO	25	mg/ml	76.7342	mM	4-(1H-benzo[d]imidazol-2-yl)-1-(5-chloro-2-methylphenyl)pyrrolidin-2-one
147	76	332.31	DMSO	25	mg/ml	75.231	mM	1,1'-(1,3-phenylene)bis(5-oxopyrrolidine-3-carboxylic acid)
148	156	248.24	DMSO	25	mg/ml	100.709	mM	2,6-dioxo-3-(p-tolyl)tetrahydropyrimidine-1(2H)-carboxylic acid
149	157	204.23	DMSO	25	mg/ml	122.411	mM	1-(p-tolyl)dihydropyrimidine-2,4(1H,3H)-dione
150	158	218.26	DMSO	25	mg/ml	114.542	mM	4-hydrazono-1-(p-tolyl)tetrahydropyrimidin-2(1H)-one
151	166	252.7	DMSO	25	mg/ml	98.9315	mM	1-(5-chloro-2-methylphenyl)-4-hydrazonotetrahydropyrimidin-2(1H)-one
152	206	238.24	DMSO	25	mg/ml	104.936	mM	methyl 3-((2-methyl-5-nitrophenyl)amino)propanoate
153	153	238.25	DMSO	25	mg/ml	104.932	mM	3-((2-methyl-5-nitrophenyl)amino)propanehydrazide
154	208	302.33	DMSO	25	mg/ml	82.6911	mM	1-(3,5-dimethyl-1H-pyrazol-1-yl)-3-((2-methyl-5-nitrophenyl)amino)propan-1-one
155	209	326.36	DMSO	25	mg/ml	76.6025	mM	N'-benzylidene-3-((2-methyl-5-nitrophenyl)amino)propanehydrazide
156	210	371.35	DMSO	25	mg/ml	67.3219	mM	3-((2-methyl-5-nitrophenyl)amino)-N'-(4-nitrobenzylidene)propanehydrazide
157	211	405.25	DMSO	25	mg/ml	61.6903	mM	N'-(4-bromobenzylidene)-3-((2-methyl-5-nitrophenyl)amino)propanehydrazide
158	215	350.33	DMSO	25	mg/ml	71.3613	mM	1-(3-((2-methyl-5-nitrophenyl)amino)propanamido)-5-oxopyrrolidine-3-carboxylic acid
159	217	336.35	DMSO	25	mg/ml	74.3273	mM	4-(1H-benzo[d]imidazol-2-yl)-1-(2-methyl-5-nitrophenyl)pyrrolidin-2-one
160	218	342.36	DMSO	25	mg/ml	73.0225	mM	N'-benzylidene-3-((4-methoxy-2-nitrophenyl)amino)propanehydrazide
161	223	308.34	DMSO	25	mg/ml	81.0793	mM	N'-(butan-2-ylidene)-3-((4-methoxy-2-nitrophenyl)amino)propanehydrazide
162	224	352.35	DMSO	25	mg/ml	70.9522	mM	4-(1H-benzo[d]imidazol-2-yl)-1-(4-methoxy-2-nitrophenyl)pyrrolidin-2-one
163	225	250.21	DMSO	25	mg/ml	99.9161	mM	3-(2-hydroxy-5-nitrophenyl)piperidine-2,6-dione
164	230	395.33	DMSO	25	mg/ml	63.2383	mM	3-((3-nitro-6,11-dioxo-6,11-dihydro-12H-benzo[b]phenoxazin-12-yl)amino)propanoic acid
165	234	235.28	DMSO	25	mg/ml	106.256	mM	ethyl 3-((2-hydroxy-5-methylphenyl)amino)but-2-enoate
166	235	255.7	DMSO	25	mg/ml	97.7708	mM	ethyl 3-((2-hydroxy-5-chlorophenyl)amino)but-2-enoate
167	236	221.26	DMSO	25	mg/ml	112.989	mM	ethyl 3-((2-hydroxyphenyl)amino)but-2-enoate
168	237	255.7	DMSO	25	mg/ml	97.7708	mM	ethyl 3-((2-hydroxy-5-chlorophenyl)amino)but-2-enoate
169	238	235.28	DMSO	25	mg/ml	106.256	mM	ethyl 3-((2-hydroxy-4-methylphenyl)amino)but-2-enoate
170	239	235.28	DMSO	25	mg/ml	106.256	mM	ethyl 3-((2-hydroxy-5-methylphenyl)amino)but-2-enoate
171	241	389.41	DMSO	25	mg/ml	64.1997	mM	ethyl3-(3-methyl-6,11-dioxo-6,11-dihydro-12H-benzo[b]phenoxazin-12-yl)but-2-enoate
172	242	222.24	DMSO	25	mg/ml	112.491	mM	3-(1-phenylureido)butanoic acid
173	245	236.27	DMSO	25	mg/ml	105.811	mM	3-(1-(2,4-dimethylphenyl)ureido)propanoic acid
174	246	242.66	DMSO	25	mg/ml	103.025	mM	3-(1-(3-chlorophenyl)ureido)propanoic acid
175	247	252.27	DMSO	25	mg/ml	99.1002	mM	3-(1-(4-ethoxyphenyl)ureido)propanoic acid
176	248	222.24	DMSO	25	mg/ml	112.491	mM	3-(1-(p-tolyl)ureido)propanoic acid
177	251	357.79	DMSO	25	mg/ml	69.8734	mM	3-((2-((3-chloroquinoxalin-2-yl)oxy)phenyl)amino)butanoic acid
178	252	392.24	DMSO	25	mg/ml	63.7365	mM	3-((5-chloro-2-((3-chloroquinoxalin-2-yl)oxy)phenyl)amino)butanoic acid
179	253	371.82	DMSO	25	mg/ml	67.2368	mM	3-((5-methyl-2-((3-chloroquinoxalin-2-yl)oxy)phenyl)amino)butanoic acid
180	256	391.42	DMSO	25	mg/ml	63.87	mM	ethyl 3-(2-methyl-6,11-dioxo-6,11-dihydro-12H-benzo[b]phenoxazin-12-yl)butanoate
181	257	363.37	DMSO	25	mg/ml	68.8004	mM	3-(6,11-dioxo-6,11-dihydro-12H-benzo[b]phenoxazin-12-yl)butanehydrazide
182	258	420.38	DMSO	25	mg/ml	59.47	mM	ethyl 3-(2-nitro-6,11-dioxo-6,11-dihydro-12H-benzo[b]phenoxazin-12-yl)but-2-enoate
183	261	400.88	DMSO	23	mg/ml	57.3738	mM	3-((5-benzylidene-4-oxo-4,5-dihydrothiazol-2-yl)(3-chloro-4-methylphenyl)amino)propanoic acid
184	263	406.9	DMSO	25	mg/ml	61.4402	mM	3-((3-chloro-4-methylphenyl)(4-oxo-5-(thiophen-2-ylmethylene)-4,5-dihydrothiazol-2-yl)amino)propanoic acid
185	264	485.8	DMSO	25	mg/ml	51.4615	mM	3-((5-((5-bromothiophen-2-yl)methylene)-4-oxo-4,5-dihydrothiazol-2-yl)(3-chloro-4-methylphenyl)amino)propanoic acid
186	266	426.87	DMSO	25	mg/ml	58.5658	mM	3-((5-chloro-2-methylphenyl)(4,9-dioxo-4,9-dihydronaphtho[2,3-d]thiazol-2-yl)amino)propanoic acid
187	268	210.19	DMSO	25	mg/ml	118.94	mM	3-((2-nitrophenyl)amino)propanoic acid
188	269	226.19	DMSO	25	mg/ml	110.527	mM	3-((2-hydroxy-5-nitrophenyl)amino)propanoic acid
189	274	223.28	DMSO	25	mg/ml	111.967	mM	3-((2-hydroxy-5-methylphenyl)amino)butanehydrazide
190	284	303.38	DMSO	25	mg/ml	82.4049	mM	3-((2-hydroxyphenyl)amino)-N'-(thiophen-2-ylmethylene)butanehydrazide
191	289	326.74	DMSO	25	mg/ml	76.5134	mM	2-((4-chlorophenyl)amino)-3a,9a-dihydronaphtho[2,3-d]oxazole-4,9-dione
192	290	334.33	DMSO	25	mg/ml	74.7764	mM	2-((4-ethoxyphenyl)amino)naphtho[2,3-d]oxazole-4,9-dione
193	292	369.17	DMSO	25	mg/ml	67.7195	mM	2-((4-bromophenyl)amino)naphtho[2,3-d]oxazole-4,9-dione
194	293	380.31	DMSO	25	mg/ml	65.7358	mM	3-(3-nitro-6,11-dioxo-6,11-dihydro-12H-benzo[b]phenoxazin-12-yl)propanoic acid
195	295	229.66	DMSO	25	mg/ml	108.857	mM	3-((5-chloro-2-hydroxyphenyl)amino)butanoic acid
196	296	221.26	DMSO	25	mg/ml	112.989	mM	ethyl (E)-3-((2-hydroxyphenyl)amino)but-2-enoate
197	297	274.36	DMSO	25	mg/ml	91.1212	mM	1-(4-isopropyl-2,5-dimethylphenyl)-6-methyldihydropyrimidine-2,4(1H,3H)-dione
198	298	319.76	DMSO	25	mg/ml	78.1836	mM	(E)-3-((4-chlorophenyl)amino)-N'-(4-fluorobenzylidene)propanehydrazide
199	300	264.24	DMSO	25	mg/ml	94.611	mM	2-hydroxy-5-(5-methyl-2,4-dioxotetrahydropyrimidin-1(2H)-yl)benzoic acid
200	301	272.3	DMSO	25	mg/ml	91.8105	mM	3-(3-methyl-1-(naphthalen-1-yl)ureido)propanoic acid
201	302	280.32	DMSO	25	mg/ml	89.1838	mM	3-(1-(4-ethoxyphenyl)-3-methylureido)-2-methylpropanoic acid
202	307	250.3	DMSO	25	mg/ml	99.8801	mM	3-(1-(2,4-dimethylphenyl)ureido)-2-methylpropanoic acid
203	313	240.26	DMSO	25	mg/ml	104.054	mM	1-(naphthalen-1-yl)dihydropyrimidine-2,4(1H,3H)-dione
204	316	234.26	DMSO	25	mg/ml	106.719	mM	1-(2-methoxyphenyl)-6-methyldihydropyrimidine-2,4(1H,3H)-dione
205	319	192.17	DMSO	25	mg/ml	130.093	mM	6-nitro-2,3-dihydroquinolin-4(1H)-one
206	320	194.19	DMSO	25	mg/ml	128.74	mM	6-methyl-7-nitro-3,4-dihydro-2H-benzo[b][1,4]oxazine
207	322	263.32	DMSO	25	mg/ml	94.9415	mM	N-(4-(4-oxo-2-thioxotetrahydropyrimidin-1(2H)-yl)phenyl)acetamide
208	323	294.57	DMSO	25	mg/ml	84.8695	mM	3-((2-bromophenyl)amino)butanoic acid hydrochloride
209	324	296.33	DMSO	25	mg/ml	84.3654	mM	5-methyl-1-(4-phenoxyphenyl)dihydropyrimidine-2,4(1H,3H)-dione
210	325	162.19	DMSO	25	mg/ml	154.14	mM	1,3,4,5-tetrahydro-2H-benzo[b][1,4]diazepin-2-one
211	326	176.22	DMSO	25	mg/ml	141.868	mM	4-methyl-1,3,4,5-tetrahydro-2H-benzo[b][1,4]diazepin-2-one
212	328	296.33	DMSO	25	mg/ml	84.3654	mM	6-methyl-1-(4-phenoxyphenyl)dihydropyrimidine-2,4(1H,3H)-dione
213	329	292.29	DMSO	25	mg/ml	85.5315	mM	5-(2,4-dioxotetrahydropyrimidin-1(2H)-yl)-2-hydroxy-3-isopropylbenzoic acid
214	333	312.39	DMSO	25	mg/ml	80.0282	mM	5-methyl-1-(4-phenoxyphenyl)-2-thioxotetrahydropyrimidin-4(1H)-one
215	334	263.27	DMSO	25	mg/ml	94.9595	mM	6-(4-oxo-2-thioxotetrahydropyrimidin-1(2H)-yl)benzo[d]oxazol-2(3H)-one
216	335	218.26	DMSO	25	mg/ml	114.542	mM	1-(2,6-dimethylphenyl)dihydropyrimidine-2,4(1H,3H)-dione
217	337	300.11	DMSO	25	mg/ml	83.3028	mM	3-(6-bromo-2-oxobenzo[d]oxazol-3(2H)-yl)-2-methylpropanoic acid
218	339	247.21	DMSO	25	mg/ml	101.129	mM	1-(2-oxo-2,3-dihydrobenzo[d]oxazol-6-yl)dihydropyrimidine-2,4(1H,3H)-dione
219	344	278.33	DMSO	25	mg/ml	89.8214	mM	4-(5-methyl-4-oxo-2-thioxotetrahydropyrimidin-1(2H)-yl)phenyl acetate
220	365	235.24	DMSO	25	mg/ml	106.274	mM	4-(hydroxyimino)-1-(4-hydroxyphenyl)-5-methyltetrahydropyrimidin-2(1H)-one
221	382	220.23	DMSO	25	mg/ml	113.518	mM	1-(2-hydroxyphenyl)-5-methyldihydropyrimidine-2,4(1H,3H)-dione
222	383	236.29	DMSO	25	mg/ml	105.802	mM	1-(4-hydroxyphenyl)-5-methyl-2-thioxotetrahydropyrimidin-4(1H)-one
223	385	352.35	DMSO	25	mg/ml	70.9522	mM	3-(2,4-dioxo-3,4-dihydroquinazolin-1(2H)-yl)-N'-(4-hydroxybenzylidene)propanehydrazide
224	389	280.24	DMSO	25	mg/ml	89.2092	mM	2-methyl-3-(6-nitro-2-oxobenzo[d]oxazol-3(2H)-yl)propanehydrazide
225	391	279.3	DMSO	25	mg/ml	89.5095	mM	3-(2-(1H-benzo[d]imidazol-2-yl)ethyl)benzo[d]oxazol-2(3H)-one
226	392	221.21	DMSO	12	mg/ml	54.2471	mM	2-methyl-3-(2-oxobenzo[d]oxazol-3(2H)-yl)propanoic acid
227	393	368.35	DMSO	25	mg/ml	67.8702	mM	N'-benzylidene-2-methyl-3-(6-nitro-2-oxobenzo[d]oxazol-3(2H)-yl)propanehydrazide
228	394	348.31	DMSO	17	mg/ml	48.8071	mM	1-(3-(2-carboxypropyl)-2-oxo-2,3-dihydrobenzo[d]oxazol-6-yl)-5-oxopyrrolidine-3-carboxylic acid
229	399	357.5	DMSO	25	mg/ml	69.9301	mM	4-(1-(2,2-diphenylhydrazono)ethyl)-N,N-diethylaniline
230	400	151.16	DMSO	25	mg/ml	165.388	mM	phenylglycine
231	401	259.1	DMSO	25	mg/ml	96.4878	mM	3-(1-(4-bromophenyl)hydrazinyl)propanoic acid
232	408	286.08	DMSO	25	mg/ml	87.3881	mM	3-(6-bromo-2-oxobenzo[d]oxazol-3(2H)-yl)propanoic acid
233	409	294.31	DMSO	25	mg/ml	84.9444	mM	1-(4-(phenyldiazenyl)phenyl)dihydropyrimidine-2,4(1H,3H)-dione
234	415	248.24	DMSO	25	mg/ml	100.709	mM	3-(2,4-dioxo-3,4-dihydroquinazolin-1(2H)-yl)propanehydrazide
235	418	207.19	DMSO	25	mg/ml	120.662	mM	3-(2-oxobenzo[d]oxazol-3(2H)-yl)propanoic acid
236	419	265.22	DMSO	25	mg/ml	94.2614	mM	1-(3-carboxy-4-hydroxyphenyl)-5-oxopyrrolidine-3-carboxylic acid
237	420	209.25	DMSO	25	mg/ml	119.474	mM	3-((4-hydroxyphenyl)amino)butanehydrazide
238	427	206.2	DMSO	25	mg/ml	121.242	mM	1-(4-hydroxyphenyl)dihydropyrimidine-2,4(1H,3H)-dione
239	429	219.24	DMSO	25	mg/ml	114.03	mM	5-oxo-1-(p-tolyl)pyrrolidine-3-carboxylic acid
240	430	221.22	DMSO	25	mg/ml	113.01	mM	3-(2-oxobenzo[d]oxazol-3(2H)-yl)propanehydrazide
241	474	326.19	DMSO	25	mg/ml	76.6424	mM	1-(3-bromo-2,4,6-trimethylphenyl)-5-oxopyrrolidine-3-carboxylic acid
242	475	234.32	DMSO	25	mg/ml	106.692	mM	1-(3,5-dimethylphenyl)-2-thioxotetrahydropyrimidin-4(1H)-one
243	476	234.26	DMSO	25	mg/ml	106.719	mM	1-(2-methoxyphenyl)-5-methyldihydropyrimidine-2,4(1H,3H)-dione
244	478	389.3	DMSO	25	mg/ml	64.2178	mM	3-((4-bromophenyl)amino)-N'-(4-(dimethylamino)benzylidene)propanehydrazide
245	480	391.37	DMSO	25	mg/ml	63.8782	mM	3-((4-bromophenyl)amino)-N'-(4-nitrobenzylidene)propanehydrazide
246	493	353.47	DMSO	25	mg/ml	70.7274	mM	4-(((9H-fluoren-9-ylidene)hydrazono)methyl)-N,N-diethylaniline
247	522	264.24	DMSO	25	mg/ml	94.611	mM	3-(6-acetamido-2-oxobenzo[d]oxazol-3(2H)-yl)propanoic acid
248	525	221.21	DMSO	25	mg/ml	113.015	mM	3-(2-oxobenzo[d]oxazol-3(2H)-yl)butanoic acid
249	431	222.2	DMSO	25	mg/ml	112.511	mM	3-(6-amino-2-oxobenzo[d]oxazol-3(2H)-yl)propanoic acid
250	533	304.26	DMSO	25	mg/ml	82.1666	mM	3-(6-(2,5-dioxopyrrolidin-1-yl)-2-oxobenzo[d]oxazol-3(2H)-yl)propanoic acid
251	534	317.32	DMSO	25	mg/ml	78.7848	mM	sodium 3-((3-cinnamoylphenyl)amino)propanoate
252	535	471.42	DMSO	25	mg/ml	53.0313	mM	sodium 3,3'-((3-(3-(3,4-dimethoxyphenyl)acryloyl)phenyl)azanediyl)dipropionate
253	551	261.28	DMSO	25	mg/ml	95.6828	mM	methyl 1-(4-acetylphenyl)-5-oxopyrrolidine-3-carboxylate
254	553	250.32	DMSO	25	mg/ml	99.8722	mM	1-(2-methoxyphenyl)-5-methyl-2-thioxotetrahydropyrimidin-4(1H)-one
255	554	319.27	DMSO	25	mg/ml	78.3036	mM	3-(6-(2,4-dioxotetrahydropyrimidin-1(2H)-yl)-2-oxobenzo[d]oxazol-3(2H)-yl)propanoic acid
256	556	220.23	DMSO	25	mg/ml	113.518	mM	1-(3-hydroxyphenyl)-5-methyldihydropyrimidine-2,4(1H,3H)-dione
257	562	245.24	DMSO	25	mg/ml	101.941	mM	2-(2,6-dioxo-3-phenyl-3,6-dihydropyrimidin-1(2H)-yl)acetamide
258	572	287.36	DMSO	25	mg/ml	86.9989	mM	ethyl 1-(2,4-dimethylphenyl)-2-methyl-4-oxo-1,4,5,6-tetrahydropyridine-3-carboxylate
259	573	206.2	DMSO	25	mg/ml	121.242	mM	3-(2-oxo-2,3-dihydro-1H-benzo[d]imidazol-1-yl)propanoic acid
261	582	277.37	DMSO	25	mg/ml	90.1323	mM	2,2,6,6-tetramethyl-N-(4-nitrophenyl)piperidin-4-amine
263	595	396.4	DMSO	25	mg/ml	63.0676	mM	3,3',3'',3'''-(1,3-phenylenebis(azanetriyl))tetrapropionic acid
264	598	262.22	DMSO	25	mg/ml	95.3398	mM	5-oxo-1-(2-oxo-2,3-dihydrobenzo[d]oxazol-6-yl)pyrrolidine-3-carboxylic acid
265	639	265.31	DMSO	25	mg/ml	94.2294	mM	3,3'-((2,4-dimethylphenyl)azanediyl)dipropionic acid
266	640	325.25	DMSO	25	mg/ml	76.864	mM	sodium 6-(1-(2-carboxylatoethyl)thioureido)-2-oxobenzo[d]oxazol-3-ide
267	641	250.27	DMSO	25	mg/ml	99.8921	mM	3-(4-oxo-2-thioxo-3,4-dihydroquinazolin-1(2H)-yl)propanoic acid
268	664	387.84	DMSO	25	mg/ml	64.4596	mM	3-((4-chlorophenyl)(4-oxo-5-(pyridin-4-ylmethylene)-4,5-dihydrothiazol-2-yl)amino)propanoic acid
269	666	240.71	DMSO	25	mg/ml	103.859	mM	1-(4-chlorophenyl)-2-thioxotetrahydropyrimidin-4(1H)-one
270	668	235.67	DMSO	25	mg/ml	106.081	mM	9-chloro-2,3,5,6-tetrahydro-1H,7H-pyrido[3,2,1-ij]quinoline-1,7-dione
271	679	223.23	DMSO	25	mg/ml	111.992	mM	2-((1-carboxypropan-2-yl)amino)benzoic acid
272	690	247.3	DMSO	25	mg/ml	101.092	mM	1-(2,4-dimethylphenyl)-4-(hydroxyimino)-5-methyltetrahydropyrimidin-2(1H)-one
273	691	252.33	DMSO	25	mg/ml	99.0766	mM	3-(1-(2,4-dimethylphenyl)thioureido)propanoic acid
274	692	313.36	DMSO	25	mg/ml	79.7804	mM	3-((4-hydroxyphenyl)amino)-N'-(4-methoxybenzylidene)propanehydrazide
275	698	364.34	DMSO	25	mg/ml	68.6172	mM	1-(2-ethoxyphenyl)-6-methyl-2-thioxotetrahydropyrimidin-4(1H)-one
276	706	324.34	DMSO	25	mg/ml	77.0796	mM	4-(6-methyl-2,4-dioxotetrahydropyrimidin-1(2H)-yl)phenyl benzoate
277	720	283.13	DMSO	25	mg/ml	88.2987	mM	1-(4-bromophenyl)-3-methyldihydropyrimidine-2,4(1H,3H)-dione
278	734	262.4	DMSO	25	mg/ml	95.2744	mM	N'-(2,2,6,6-tetramethylpiperidin-4-yl)benzene-1,2,4-triamine
279	736	322.37	DMSO	25	mg/ml	77.5506	mM	N-(2,4-dinitrophenyl)-2,2,6,6-tetramethylpiperidin-4-amine
280	741	247.25	DMSO	25	mg/ml	101.112	mM	1-(4-acetylphenyl)-5-oxopyrrolidine-3-carboxylic acid
281	742	275.31	DMSO	25	mg/ml	90.8067	mM	1-(4-(1-hydrazonoethyl)phenyl)-5-oxopyrrolidine-3-carbohydrazide
282	743	451.53	DMSO	25	mg/ml	55.3673	mM	N'-(benzylidene)-1-(4-(1-((benzylidene)hydrazono)ethyl)phenyl)-5-oxopyrrolidine-3-carbohydrazide
283	744	511.58	DMSO	25	mg/ml	48.8682	mM	N'-(4-methoxybenzylidene)-1-(4-(1-((4-methoxybenzylidene)hydrazono)ethyl)phenyl)-5-oxopyrrolidine-3-carbohydrazide
284	745	609.32	DMSO	25	mg/ml	41.0293	mM	N'-(4-bromobenzylidene)-1-(4-(1-((4-bromobenzylidene)hydrazono)ethyl)phenyl)-5-oxopyrrolidine-3-carbohydrazide
285	772	490.52	DMSO	25	mg/ml	50.9663	mM	1,1'-((hydrazine-1,2-diylidenebis(ethan-1-yl-1-ylidene))bis(3,1-phenylene))bis(5-oxopyrrolidine-3-carboxylic acid)
286	780	412.84	DMSO	25	mg/ml	60.5561	mM	2-chloro-3-(4-(4-oxo-2-thioxotetrahydropyrimidin-1(2H)-yl)phenoxy)naphthalene-1,4-dione
287	783	336.32	DMSO	25	mg/ml	74.334	mM	1-(2-methoxy-5-nitrophenyl)-4-(5-thioxo-4,5-dihydro-1,3,4-oxadiazol-2-yl)pyrrolidin-2-one
288	842	417.39	DMSO	25	mg/ml	59.896	mM	2-(2-(5-oxo-1-(3-(trifluoromethyl)phenyl)pyrrolidin-3-yl)-1H-benzo[d]imidazol-1-yl)acetohydrazide
289	858	495.51	DMSO	25	mg/ml	50.4531	mM	N-(2,5-dimethyl-1H-pyrrol-1-yl)-2-(2-(5-oxo-1-(3-(trifluoromethyl)phenyl)pyrrolidin-3-yl)-1H-benzo[d]imidazol-1-yl)acetamide
290	859	441.54	DMSO	25	mg/ml	56.62	mM	N-(2,5-dimethyl-1H-pyrrol-1-yl)-2-(2-(5-oxo-1-(m-tolyl)pyrrolidin-3-yl)-1H-benzo[d]imidazol-1-yl)acetamide

## Sheet: Compound ID 1-140
NO ID	ID in collection	Molar mass	Solvent	Concentration				Name
NO 1	1	390.665	DMSO	25	mg/ml	63.9934	mM	1-(4-bromophenyl)-4-(5-chloro-1H-benzo[d]imidazol-2-yl)pyrrolidin-2-one	Conc min	33.3846
NO 2	2	312.753	DMSO	25	mg/ml	79.9353	mM	4-(benzo[d]oxazol-2-yl)-1-(4-chlorophenyl)pyrrolidin-2-one	Conc Max	141.869
NO 3	5	325.796	DMSO	25	mg/ml	76.7351	mM	1-(4-chlorophenyl)-4-(5-methyl-1H-benzo[d]imidazol-2-yl)pyrrolidin-2-one	Media	77.5562
NO 4	6	311.769	DMSO	25	mg/ml	80.1876	mM	4-(1H-benzo[d]imidazol-2-yl)-1-(3-chlorophenyl)pyrrolidin-2-one
NO 5	7	361.829	DMSO	25	mg/ml	69.0934	mM	1-(3-chlorophenyl)-4-(1H-naphtho[2,3-d]imidazol-2-yl)pyrrolidin-2-one
NO 6	8	277.327	DMSO	25	mg/ml	90.1463	mM	4-(1H-benzo[d]imidazol-2-yl)-1-phenylpyrrolidin-2-one
NO 7	9	353.806	DMSO	25	mg/ml	70.6602	mM	4-(1-acetyl-1H-benzo[d]imidazol-2-yl)-1-(4-chlorophenyl)pyrrolidin-2-one
NO 8	10	227.195	DMSO	25	mg/ml	110.038	mM	Sodium 5-oxo-1-phenylpyrrolidine-3-carboxylate
NO 9	11	284.109	DMSO	25	mg/ml	87.9944	mM	1-(4-bromophenyl)-5-oxopyrrolidine-3-carboxylic acid
NO 10	12	205.213	DMSO	25	mg/ml	121.825	mM	5-oxo-1-phenylpyrrolidine-3-carboxylic acid
NO 11	13	239.655	DMSO	25	mg/ml	104.317	mM	1-(4-chlorophenyl)-5-oxopyrrolidine-3-carboxylic acid
NO 12	14	239.655	DMSO	25	mg/ml	104.317	mM	1-(3-chlorophenyl)-5-oxopyrrolidine-3-carboxylic acid
NO 13	15	298.136	DMSO	25	mg/ml	83.8543	mM	Methyl 1-(4-bromophenyl)-5-oxopyrrolidine-3-carboxylate
NO 14	16	233.267	DMSO	25	mg/ml	107.173	mM	1-(2,4-dimethylphenyl)-5-oxopyrrolidine-3-carboxylic acid
NO 15	17	447.923	DMSO	25	mg/ml	55.8132	mM	1-(4-chlorophenyl)-4-(1-(2-(3,5-dimethyl-1H-pyrazol-1-yl)-2-oxoethyl)-1H-benzo[d]imidazol-2-yl)pyrrolidin-2-one
NO 16	18	229.239	DMSO	25	mg/ml	109.056	mM	4-(1,3,4-oxadiazol-2-yl)-1-phenylpyrrolidin-2-one
NO 17	19	295.741	DMSO	25	mg/ml	84.5334	mM	1-(4-chlorophenyl)-4-(5-mercapto-1,3,4-oxadiazol-2-yl)pyrrolidin-2-one
NO 18	26	383.832	DMSO	25	mg/ml	65.1327	mM	3-(2-(1-(4-chlorophenyl)-5-oxopyrrolidin-3-yl)-1H-benzo[d]imidazol-1-yl)propanoic acid
NO 19	27	397.859	DMSO	25	mg/ml	62.8363	mM	Ethyl 2-(2-(1-(4-chlorophenyl)-5-oxopyrrolidin-3-yl)-1H-benzo[d]imidazol-1-yl)acetate
NO 20	29	260.249	DMSO	25	mg/ml	96.0618	mM	Quinolin-4-ylaspartic acid
NO 21	30	216.24	DMSO	25	mg/ml	115.612	mM	3-(quinolin-4-ylamino)propanoic acid
NO 22	31	447.923	DMSO	25	mg/ml	55.8132	mM	1-(3-chlorophenyl)-4-(1-(2-(3,5-dimethyl-1H-pyrazol-1-yl)-2-oxoethyl)-1H-benzo[d]imidazol-2-yl)pyrrolidin-2-one
NO 23	32	262.197	DMSO	25	mg/ml	95.3482	mM	sodium 3-((4-methoxy-2-nitrophenyl)amino)propanoate
NO 24	34	380.832	DMSO	25	mg/ml	65.6457	mM	N'-((3H-indol-3-yl)methylene)-1-(4-chlorophenyl)-5-oxopyrrolidine-3-carbohydrazide
NO 25	36	378.381	DMSO	25	mg/ml	66.071	mM	3,3'-((1-(2-carboxyethyl)-4-oxo-1,2,3,4-tetrahydroquinolin-7-yl)azanediyl)dipropionic acid
NO 26	37	418.247	DMSO	25	mg/ml	59.7733	mM	3-(6-bromo-2-oxobenzo[d]oxazol-3(2H)-yl)-N'-(4-methoxybenzylidene)propanehydrazide
NO 27	41	234.317	DMSO	25	mg/ml	106.693	mM	1-(2,5-dimethylphenyl)-2-thioxotetrahydropyrimidin-4(1H)-one
NO 28	42	231.295	DMSO	25	mg/ml	108.087	mM	3-(2,4-dimethylphenyl)-5-methylpiperidine-2,6-dione
NO 29	43	217.268	DMSO	25	mg/ml	115.065	mM	3-(2,5-dimethylphenyl)piperidine-2,6-dione
NO 30	58	238.305	DMSO	25	mg/ml	104.908	mM	3-(1-(m-tolyl)thioureido)propanoic acid
NO 31	61	238.305	DMSO	25	mg/ml	104.908	mM	3-(1-(p-tolyl)thioureido)propanoic acid
NO 32	63	316.375	DMSO	25	mg/ml	79.0202	mM	3-(1-(4-phenoxyphenyl)thioureido)propanoic acid
NO 33	64	298.741	DMSO	25	mg/ml	83.6845	mM	3-((3-chlorophenyl)(4-oxo-4,5-dihydrothiazol-2-yl)amino)propanoic acid
NO 34	65	314.403	DMSO	25	mg/ml	79.5158	mM	5-amino-4-(4-(phenylamino)phenyl)-5-thioxopentanoic acid
NO 35	66	510.982	DMSO	25	mg/ml	48.9254	mM	N'-((1H-indol-3-yl)methylene)-2-(2-(1-(4-chlorophenyl)-5-oxopyrrolidin-3-yl)-1H-benzo[d]imidazol-1-yl)acetohydrazide
NO 36	74	237.263	DMSO	25	mg/ml	105.368	mM	2-((3-hydrazinyl-3-oxopropyl)amino)benzohydrazide
NO 37	76	332.312	DMSO	25	mg/ml	75.2305	mM	1,1'-(1,3-phenylene)bis(5-oxopyrrolidine-3-carboxylic acid)
NO 38	80	372.809	DMSO	25	mg/ml	67.0585	mM	N-(4-chlorophenyl)-2-(5-oxo-1-phenylpyrrolidine-3-carbonyl)hydrazine-1-carboxamide
NO 39	108	438.531	DMSO	25	mg/ml	57.0085	mM	N'-((9-ethyl-9H-carbazol-3-yl)methylene)-5-oxo-1-(p-tolyl)pyrrolidine-3-carbohydrazide
NO 40	109	364.449	DMSO	25	mg/ml	68.5967	mM	N'-(4-(dimethylamino)benzylidene)-5-oxo-1-(m-tolyl)pyrrolidine-3-carbohydrazide
NO 41	111	438.531	DMSO	25	mg/ml	57.0085	mM	N'-((9-ethyl-9H-carbazol-3-yl)methylene)-5-oxo-1-(m-tolyl)pyrrolidine-3-carbohydrazide
NO 42	115	414.303	DMSO	25	mg/ml	60.3423	mM	N'-(4-bromobenzylidene)-1-(2,5-dimethylphenyl)-5-oxopyrrolidine-3-carbohydrazide
NO 43	116	400.276	DMSO	25	mg/ml	62.4569	mM	N'-(4-bromobenzylidene)-5-oxo-1-(p-tolyl)pyrrolidine-3-carbohydrazide
NO 44	119	297.358	DMSO	25	mg/ml	84.0737	mM	4-(3,5-dimethyl-1H-pyrazole-1-carbonyl)-1-(m-tolyl)pyrrolidin-2-one
NO 45	120	297.358	DMSO	25	mg/ml	84.0737	mM	4-(3,5-dimethyl-1H-pyrazole-1-carbonyl)-1-(p-tolyl)pyrrolidin-2-one
NO 46	121	392.503	DMSO	25	mg/ml	63.6938	mM	N'-(4-(dimethylamino)benzylidene)-N-ethyl-5-oxo-1-(p-tolyl)pyrrolidine-3-carbohydrazide
NO 47	123	364.449	DMSO	25	mg/ml	68.5967	mM	N'-(4-(dimethylamino)benzylidene)-5-oxo-1-(p-tolyl)pyrrolidine-3-carbohydrazide
NO 48	124	337.379	DMSO	25	mg/ml	74.1006	mM	N'-(4-hydroxybenzylidene)-5-oxo-1-(m-tolyl)pyrrolidine-3-carbohydrazide
NO 49	126	380.404	DMSO	25	mg/ml	65.7196	mM	1-(2,5-dimethylphenyl)-N'-(4-nitrobenzylidene)-5-oxopyrrolidine-3-carbohydrazide
NO 50	127	366.377	DMSO	25	mg/ml	68.2357	mM	N'-(4-nitrobenzylidene)-5-oxo-1-(p-tolyl)pyrrolidine-3-carbohydrazide
NO 51	128	394.431	DMSO	25	mg/ml	63.3824	mM	N-ethyl-N'-(4-nitrobenzylidene)-5-oxo-1-(p-tolyl)pyrrolidine-3-carbohydrazide
NO 52	131	438.531	DMSO	25	mg/ml	57.0085	mM	N'-((9-ethyl-9H-carbazol-3-yl)methylene)-5-oxo-1-(m-tolyl)pyrrolidine-3-carbohydrazide
NO 53	132	451.53	DMSO	25	mg/ml	55.3673	mM	N'-benzylidene-2-(2-(5-oxo-1-(m-tolyl)pyrrolidin-3-yl)-1H-benzo[d]imidazol-1-yl)acetohydrazide
NO 54	133	417.513	DMSO	25	mg/ml	59.8784	mM	N'-(butan-2-ylidene)-2-(2-(5-oxo-1-(m-tolyl)pyrrolidin-3-yl)-1H-benzo[d]imidazol-1-yl)acetohydrazide
NO 55	134	481.556	DMSO	25	mg/ml	51.915	mM	N'-(4-methoxybenzylidene)-2-(2-(5-oxo-1-(m-tolyl)pyrrolidin-3-yl)-1H-benzo[d]imidazol-1-yl)acetohydrazide
NO 56	136	494.599	DMSO	25	mg/ml	50.546	mM	N'-(4-(dimethylamino)benzylidene)-2-(2-(5-oxo-1-(m-tolyl)pyrrolidin-3-yl)-1H-benzo[d]imidazol-1-yl)acetohydrazide
NO 57	193	349.39	DMSO	25	mg/ml	71.5533	mM	2-(2-(5-oxo-1-(m-tolyl)pyrrolidin-3-yl)-1H-benzo[d]imidazol-1-yl)acetic acid
NO 58	140	343.811	DMSO	25	mg/ml	72.7144	mM	3-(1H-benzo[d]imidazol-2-yl)-4-((5-chloro-2-methylphenyl)amino)butanoic acid
NO 59	141	411.886	DMSO	25	mg/ml	60.6964	mM	Ethyl 2-(2-(1-(5-chloro-2-methylphenyl)-5-oxopyrrolidin-3-yl)-1H-benzo[d]imidazol-1-yl)acetate
NO 60	144	323.396	DMSO	25	mg/ml	77.3046	mM	3-(1H-benzo[d]imidazol-2-yl)-4-((2,5-dimethylphenyl)amino)butanoic acid
NO 61	145	391.471	DMSO	25	mg/ml	63.8617	mM	Ethyl 2-(2-(1-(2,5-dimethylphenyl)-5-oxopyrrolidin-3-yl)-1H-benzo[d]imidazol-1-yl)acetate
NO 62	149	275.736	DMSO	25	mg/ml	90.6664	mM	5-(3-chloro-4-methylphenyl)-4-methyl-2,5,6,7-tetrahydro-3H-pyrazolo[4,3-c]pyridin-3-one
NO 63	150	276.72	DMSO	25	mg/ml	90.344	mM	5-(3-chloro-4-methylphenyl)-4-methyl-6,7-dihydroisoxazolo[4,3-c]pyridin-3(5H)-one
NO 64	151	351.834	DMSO	25	mg/ml	71.0562	mM	5-(3-chloro-4-methylphenyl)-4-methyl-2-phenyl-2,5,6,7-tetrahydro-3H-pyrazolo[4,3-c]pyridin-3-one
NO 65	153	351.834	DMSO	25	mg/ml	71.0562	mM	5-(5-chloro-2-methylphenyl)-4-methyl-2-phenyl-2,5,6,7-tetrahydro-3H-pyrazolo[4,3-c]pyridin-3-one
NO 66	160	564.66	DMSO	25	mg/ml	44.2744	mM	N'-((9-ethyl-9H-carbazol-3-yl)methylene)-5-oxo-1-(4-(phenylsulfonyl)phenyl)pyrrolidine-3-carbohydrazide
NO 67	161	359.4	DMSO	25	mg/ml	69.5604	mM	5-oxo-1-(4-(phenylsulfonyl)phenyl)pyrrolidine-3-carbohydrazide
NO 68	162	359.396	DMSO	25	mg/ml	69.5612	mM	Methyl 5-oxo-1-(4-(phenylsulfonyl)phenyl)pyrrolidine-3-carboxylate
NO 69	163	310.738	DMSO	25	mg/ml	80.4536	mM	2-(3-(3-chloro-4-methylphenyl)-2,6-dioxotetrahydropyrimidin-1(2H)-yl)acetohydrazide
NO 70	167	294.311	DMSO	25	mg/ml	84.9442	mM	3-((2-methoxy-4-nitrophenyl)amino)-N'-(propan-2-ylidene)propanehydrazide
NO 71	168	337.288	DMSO	25	mg/ml	74.1206	mM	Methyl 2-(3-(2-methoxy-4-nitrophenyl)-2,6-dioxotetrahydropyrimidin-1(2H)-yl)acetate
NO 72	169	265.225	DMSO	25	mg/ml	94.2596	mM	1-(2-methoxy-4-nitrophenyl)dihydropyrimidine-2,4(1H,3H)-dione
NO 73	170	318.333	DMSO	25	mg/ml	78.5341	mM	1-(3,5-dimethyl-1H-pyrazol-1-yl)-3-((2-methoxy-4-nitrophenyl)amino)propan-1-one
NO 74	171	308.338	DMSO	25	mg/ml	81.0799	mM	N'-(butan-2-ylidene)-3-((2-methoxy-4-nitrophenyl)amino)propanehydrazide
NO 75	172	387.352	DMSO	25	mg/ml	64.5408	mM	3-((2-methoxy-4-nitrophenyl)amino)-N'-(4-nitrobenzylidene)propanehydrazide
NO 76	173	342.355	DMSO	25	mg/ml	73.0236	mM	N'-benzylidene-3-((2-methoxy-4-nitrophenyl)amino)propanehydrazide
NO 77	178	385.424	DMSO	25	mg/ml	64.8636	mM	N'-(4-(dimethylamino)benzylidene)-3-((2-methoxy-4-nitrophenyl)amino)propanehydrazide
NO 78	198	371.353	DMSO	25	mg/ml	67.3214	mM	3-((2-methyl-4-nitrophenyl)amino)-N'-(4-nitrobenzylidene)propanehydrazide
NO 79	199	405.252	DMSO	25	mg/ml	61.69	mM	N'-(4-bromobenzylidene)-3-((2-methyl-4-nitrophenyl)amino)propanehydrazide
NO 80	205	296.33	DMSO	25	mg/ml	84.3654	mM	N-(2-(1H-benzo[d]imidazol-2-yl)ethyl)-2-methyl-5-nitroaniline
NO 81	208	302.334	DMSO	25	mg/ml	82.69	mM	1-(3,5-dimethyl-1H-pyrazol-1-yl)-3-((2-methyl-5-nitrophenyl)amino)propan-1-one
NO 82	210	371.353	DMSO	25	mg/ml	67.3214	mM	3-((2-methyl-5-nitrophenyl)amino)-N'-(4-nitrobenzylidene)propanehydrazide
NO 83	216	331.328	DMSO	25	mg/ml	75.4539	mM	1-(3-(2,4-dioxotetrahydropyrimidin-1(2H)-yl)-4-methylphenyl)-5-oxopyrrolidine-3-carboxylic acid
NO 84	226	375.38	DMSO	25	mg/ml	66.5992	mM	Ethyl 3-(6,11-dioxo-6,11-dihydro-12H-benzo[b]phenoxazin-12-yl)but-2-enoate
NO 85	227	389.407	DMSO	25	mg/ml	64.2002	mM	Ethyl 3-(2-methyl-6,11-dioxo-6,11-dihydro-12H-benzo[b]phenoxazin-12-yl)but-2-enoate
NO 86	228	391.423	DMSO	25	mg/ml	63.8695	mM	Ethyl 3-(2-methyl-6,11-dioxo-6,11-dihydro-12H-benzo[b]phenoxazin-12-yl)butanoate
NO 87	229	409.822	DMSO	25	mg/ml	61.0021	mM	Ethyl 3-(2-chloro-6,11-dioxo-6,11-dihydro-12H-benzo[b]phenoxazin-12-yl)but-2-enoate
NO 88	231	351.376	DMSO	25	mg/ml	71.1489	mM	3-(6,11-dioxo-6,11-dihydro-12H-benzo[b]phenothiazin-12-yl)propanoic acid
NO 89	232	197.252	DMSO	25	mg/ml	126.741	mM	3-((2-mercaptophenyl)amino)propanoic acid
NO 90	233	269.315	DMSO	25	mg/ml	92.8281	mM	3-((2-((2-carboxyethyl)amino)phenyl)thio)propanoic acid
NO 91	243	236.271	DMSO	25	mg/ml	105.811	mM	2-methyl-3-(1-(p-tolyl)ureido)propanoic acid
NO 92	260	445.874	DMSO	25	mg/ml	56.0697	mM	3-((3-chloro-4-methylphenyl)(5-(4-nitrobenzylidene)-4-oxo-4,5-dihydrothiazol-2-yl)amino)propanoic acid
NO 93	262	390.838	DMSO	25	mg/ml	63.9651	mM	3-((3-chloro-4-methylphenyl)(5-(furan-2-ylmethylene)-4-oxo-4,5-dihydrothiazol-2-yl)amino)propanoic acid
NO 94	265	426.871	DMSO	25	mg/ml	58.5657	mM	3-((3-chloro-4-methylphenyl)(4,9-dioxo-4,9-dihydronaphtho[2,3-d]thiazol-2-yl)amino)propanoic acid
NO 95	271	266.253	DMSO	25	mg/ml	93.8957	mM	Ethyl 3-((2-hydroxy-5-nitrophenyl)amino)but-2-enoate
NO 96	272	195.218	DMSO	25	mg/ml	128.062	mM	3-((2-hydroxyphenyl)amino)butanoic acid
NO 97	282	315.348	DMSO	25	mg/ml	79.2775	mM	N'-(4-fluorobenzylidene)-3-((2-hydroxyphenyl)amino)butanehydrazide
NO 98	281	342.355	DMSO	25	mg/ml	73.0236	mM	N'-(4-nitrobenzylidene)-3-((2-hydroxyphenyl)amino)butanehydrazide
NO 99	285	382.276	DMSO	25	mg/ml	65.3978	mM	N'-((5-bromothiophen-2-yl)methylene)-3-((2-hydroxyphenyl)amino)butanehydrazide
NO 100	286		DMSO	25	mg/ml			PENDING
NO 101	303	334.372	DMSO	25	mg/ml	74.767	mM	5-(2,4-dioxotetrahydropyrimidin-1(2H)-yl)-3-hexyl-2-hydroxybenzoic acid
NO 102	306	254.289	DMSO	25	mg/ml	98.3133	mM	3-methyl-1-(naphthalen-1-yl)dihydropyrimidine-2,4(1H,3H)-dione
NO 103	310	268.357	DMSO	25	mg/ml	93.1595	mM	5-oxo-1-(2,2,6,6-tetramethylpiperidin-4-yl)pyrrolidine-3-carboxylic acid
NO 104	311	434.364	DMSO	25	mg/ml	57.5554	mM	N-(4-ethoxyphenyl)-2,4,7-trinitro-9H-fluoren-9-imine
NO 105	321	194.184	DMSO	25	mg/ml	128.744	mM	Sodium 3-(thiazol-2-ylamino)propanoate
NO 106	332	297.307	DMSO	25	mg/ml	84.0882	mM	3,3'-((3,4-dimethoxyphenyl)azanediyl)dipropionic acid
NO 107	341	271.32	DMSO	25	mg/ml	92.1421	mM	3-((4-hydroxyphenyl)amino)-N'-phenylpropanehydrazide
NO 108	346	369.934	DMSO	25	mg/ml	67.5796	mM	2-methyl-3-((4-((2,2,6,6-tetramethylpiperidin-4-yl)amino)phenyl)amino)propanoic acid hydrochloride
NO 109	347	176.219	DMSO	25	mg/ml	141.869	mM	3-methyl-1,3,4,5-tetrahydro-2H-benzo[b][1,4]diazepin-2-one
NO 110	348	306.325	DMSO	25	mg/ml	81.6127	mM	1-(2-(1H-benzo[d]imidazol-2-yl)ethyl)quinazoline-2,4(1H,3H)-dione
NO 111	368	615.326	DMSO	25	mg/ml	40.6289	mM	3,3'-((2-hydroxyphenyl)azanediyl)bis(N'-(4-bromobenzylidene)-propanehydrazide)
NO 112	385	352.35	DMSO	25	mg/ml	70.9522	mM	3-(2,4-dioxo-3,4-dihydroquinazolin-1(2H)-yl)-N'-(4-hydroxybenzylidene)propanehydrazide
NO 113	387	282.343	DMSO	25	mg/ml	88.5448	mM	3-((9-ethyl-9H-carbazol-3-yl)amino)propanoic acid
NO 114	390	300.108	DMSO	25	mg/ml	83.3033	mM	Methyl 3-(6-bromo-2-oxobenzo[d]oxazol-3(2H)-yl)propanoate
NO 115	391	279.299	DMSO	25	mg/ml	89.5098	mM	3-(2-(1H-benzo[d]imidazol-2-yl)ethyl)benzo[d]oxazol-2(3H)-one
NO 116	392	221.212	DMSO	25	mg/ml	113.014	mM	2-methyl-3-(2-oxobenzo[d]oxazol-3(2H)-yl)propanoic acid
NO 117	393	368.349	DMSO	25	mg/ml	67.8704	mM	N'-benzylidene-2-methyl-3-(6-nitro-2-oxobenzo[d]oxazol-3(2H)-yl)propanehydrazide
NO 118	397	748.848	DMSO	25	mg/ml	33.3846	mM	2,2',2'',2'''-(1,4-phenylenebis(azanetriyl))tetrakis(N'-((E)-benzylidene)acetohydrazide)
NO 119	416	308.063	DMSO	25	mg/ml	81.1523	mM	Sodium 3-(6-bromo-2-oxobenzo[d]oxazol-3(2H)-yl)propanoate
NO 120	417	359.785	DMSO	25	mg/ml	69.4859	mM	1-(4-chlorophenyl)-N'-(4-fluorobenzylidene)-5-oxopyrrolidine-3-carbohydrazide
NO 121	445	388.896	DMSO	25	mg/ml	64.2845	mM	3-((4-chlorophenyl)amino)-N'-(4-(diethylamino)-2-hydroxybenzylidene)propanehydrazide
NO 122	449	450.398	DMSO	25	mg/ml	55.5065	mM	4-(3-(4-fluorobenzoyl)-2,4-dioxotetrahydropyrimidin-1(2H)-yl)phenyl 4-fluorobenzoate
NO 123	451	424.504	DMSO	25	mg/ml	58.8923	mM	N'-((9-ethyl-9H-carbazol-3-yl)methylene)-5-oxo-1-phenylpyrrolidine-3-carbohydrazide
NO 124	459	289.379	DMSO	25	mg/ml	86.3919	mM	1-(4-nitrophenyl)-N-(2,2,6,6-tetramethylpiperidin-4-yl)methanimine
NO 125	464	457.534	DMSO	25	mg/ml	54.6407	mM	3,3'-((2-hydroxyphenyl)azanediyl)bis(N'-((E)-benzylidene)propanehydrazide)
NO 126	491	336.351	DMSO	25	mg/ml	74.3271	mM	N'-benzylidene-3-(2,4-dioxo-3,4-dihydroquinazolin-1(2H)-yl)propanehydrazide
NO 127	502	476.54	DMSO	25	mg/ml	52.4615	mM	1,1'-(1,4-phenylene)bis(4-(1H-benzo[d]imidazol-2-yl)pyrrolidin-2-one)
NO 128	568	262.309	DMSO	25	mg/ml	95.3074	mM	1-(3-(tert-butyl)-4-hydroxyphenyl)dihydropyrimidine-2,4(1H,3H)-dione
NO 129	570	326.414	DMSO	25	mg/ml	76.5899	mM	1-(2-(benzyloxy)phenyl)-6-methyl-2-thioxotetrahydropyrimidin-4(1H)-one
NO 130	583	358.486	DMSO	25	mg/ml	69.7377	mM	5-methyl-1-(4-((2,2,6,6-tetramethylpiperidin-4-yl)amino)phenyl)dihydropyrimidine-2,4(1H,3H)-dione
NO 131	665	429.919	DMSO	25	mg/ml	58.1505	mM	3-((4-chlorophenyl)(5-(4-(dimethylamino)benzylidene)-4-oxo-4,5-dihydrothiazol-2-yl)amino)propanoic acid
NO 132	667	412.844	DMSO	25	mg/ml	60.5556	mM	3-((4-chlorophenyl)(4,9-dioxo-4,9-dihydronaphtho[2,3-d]thiazol-2-yl)amino)propanoic acid
NO 133	669	291.779	DMSO	25	mg/ml	85.6813	mM	3-((4-chlorophenyl)amino)-N-(2,5-dimethyl-1H-pyrrol-1-yl)propanamide
NO 134	698	264.343	DMSO	25	mg/ml	94.5741	mM	1-(2-ethoxyphenyl)-6-methyl-2-thioxotetrahydropyrimidin-4(1H)-one
NO 135	IR1	PENDING	DMSO	25	mg/ml			PENDING
NO 136	BB1	PENDING	DMSO	25	mg/ml			PENDING
NO 137	BB2	PENDING	DMSO	25	mg/ml			PENDING
NO 138	BB3	PENDING	DMSO	25	mg/ml			PENDING
NO 139	BB4	PENDING	DMSO	25	mg/ml			PENDING
NO 140	BB5	PENDING	DMSO	25	mg/ml			PENDING

## Sheet: Compound ID BG-SZ
NO ID	ID in collection	Molar mass	Solvent	Concentration				Name
B No 1	B-G-3-52	297.36	DMSO	30	mg/ml	100.888	mM	(E)-N'-benzylidene-3-((4-hydroxyphenyl)amino)butanehydrazide
B No 2	B-G-3-49	340.43	DMSO	30	mg/ml	88.1238	mM	(E)-N'-(4-(dimethylamino)benzylidene)-3-((4-hydroxyphenyl)amino)butanehydrazide
B No 3	B-G-3-53	327.38	DMSO	30	mg/ml	91.6366	mM	(E)-3-((4-hydroxyphenyl)amino)-N'-(4-methoxybenzylidene)butanehydrazide
B No 4	B-G-3-54	297.36	DMSO	30	mg/ml	100.888	mM	(E)-N'-benzylidene-3-((4-hydroxyphenyl)amino)-2-methylpropanehydrazide
B No 5	B-G-3-60	289.35	DMSO	30	mg/ml	103.681	mM	(E)-3-((4-hydroxyphenyl)amino)-N'-(thiophen-2-ylmethylene)propanehydrazide
B No 6	B-G-3-57	334.35	DMSO	30	mg/ml	89.7263	mM	(E)-3-((4-hydroxyphenyl)amino)-N'-((5-nitrothiophen-2-yl)methylene)propanehydrazide
B No 7	B-G-3-58	318.29	DMSO	30	mg/ml	94.2537	mM	(E)-3-((4-hydroxyphenyl)amino)-N'-((5-nitrofuran-2-yl)methylene)propanehydrazide
B No 8	B-G-3-62	273.34	DMSO	30	mg/ml	109.753	mM	N-(2,5-dimethyl-1H-pyrrol-1-yl)-3-((4-hydroxyphenyl)amino)propanamide
B No 9	B-G-3-64	457.53	DMSO	30	mg/ml	65.5695	mM	3,3'-((4-hydroxyphenyl)azanediyl)bis(N'-((E)-benzylidene)propanehydrazide)
B No 10	B-G-3-65	543.67	DMSO	30	mg/ml	55.1805	mM	3,3'-((4-hydroxyphenyl)azanediyl)bis(N'-((E)-4-(dimethylamino)benzylidene)propanehydrazide)
B No 11	B-G-3-66	526.42	DMSO	30	mg/ml	56.9887	mM	3,3'-((4-hydroxyphenyl)azanediyl)bis(N'-((E)-4-chlorobenzylidene)propanehydrazide)
B No 12	B-G-3-67	259.31	DMSO	30	mg/ml	115.692	mM	1-(3,5-dimethyl-1H-pyrazol-1-yl)-3-((4-hydroxyphenyl)amino)propan-1-one
B No 13	SZ-Cl5	412.89	DMSO	30	mg/ml	72.6586	mM	1-(4-chlorophenyl)-4-(5-((2-oxo-2-phenylethyl)sulfanyl)-1H-1,2,4-triazol-3-yl)pyrrolidin-2-one
B No 14	SZ-Cl8	366.83	DMSO	25	mg/ml	68.1515	mM	((3-(1-(4-chlorophenyl)-5-oxopyrrolidin-3-yl)-1H-1,2,4-triazol-5-yl)sulfanyl)ethanehydrazide
B No 15	SZ-Cl9	394.88	DMSO	25	mg/ml	63.3104	mM	1-(4-chlorophenyl)-4-(5-phenyl[1,3]thiazolo[3,2-b][1,2,4]triazol-2-yl)pyrrolidin-2-one
B No 16	SZ-002	499.93	DMSO	25	mg/ml	50.007	mM	((3-(1-(4-chlorophenyl)-5-oxopyrrolidin-3-yl)-1H-1,2,4-triazol-5-yl)sulfanyl)-N'-(4-nitrophenyl)methylidene)ethanehydrazide
B No 17	SZ-004	460.96	DMSO	25	mg/ml	54.2346	mM	((3-(1-(4-chlorophenyl)-5-oxopyrrolidin-3-yl)-1H-1,2,4-triazol-5-yl)sulfanyl)-N'-(thiophen-2-ylmethylidene)ethanehydrazide
B No 18	SZ-006	454.93	DMSO	25	mg/ml	54.9535	mM	((3-(1-(4-chlorophenyl)-5-oxopyrrolidin-3-yl)-1H-1,2,4-triazol-5-yl)sulfanyl)-N'-(phenylmethylidene)ethanehydrazide
B No 19	SZ-009	444.94	DMSO	25	mg/ml	56.1874	mM	1-(4-chlorophenyl)-4-(5-((2-((2,5-dimethyl-1H-pyrrol-1-yl)amino)-2-oxoethyl)sulfanyl)-1H-1,2,4-triazol-3-yl)pyrrolidin-2-one
B No 20	SZ-014	430.88	DMSO	25	mg/ml	58.0208	mM	1-(4-chlorophenyl)-4-(5-((2-(4-fluorophenyl)-2-oxoethyl)sulfanyl)-1H-1,2,4-triazol-3-yl)pyrrolidin-2-one
B No 21	SZ-015	457.89	DMSO	25	mg/ml	54.5983	mM	1-(4-chlorophenyl)-4-(5-((2-(4-nitrophenyl)-2-oxoethyl)sulfanyl)-1H-1,2,4-triazol-3-yl)pyrrolidin-2-one
B No 22	SZ-019	435.95	DMSO	25	mg/ml	57.346	mM	4-((4-chlorophenyl)amino)-1-((2,5-dimethyl-1H-pyrrol-1-yl)amino)-3-(6-methyl-1H-benzimidazol-2-yl)butan-1-one
B No 23	SZ-20	475.97	DMSO	30	mg/ml	63.0292	mM	4-((4-chlorophenyl)amino)-N'-((E)-(4-methoxyphenyl)methylidene)-3-(6-methyl-1H-benzimidazol-2-yl)butanehydrazide
B No 24	SZ-21	393.84	DMSO	30	mg/ml	76.1731	mM	N-(4-(aminosulfonyl)phenyl)-1-(4-chlorophenyl)-5-oxopyrrolidine-3-carboxamide
B No 25	SZ-22	519.96	DMSO	25	mg/ml	48.0806	mM	4-(4-((2-((1-(4-chlorophenyl)-5-oxopyrrolidin-3-yl)carbonyl)hydrazinyl)carbonyl)-2-oxopyrrolidin-1-yl)benzenesulfonamide
B No 26	SZ-26	329.78	DMSO	25	mg/ml	75.8081	mM	(1-(4-chlorophenyl)-5-oxopyrrolidin-3-yl)-N-phenylcarbamic amide
B No 27	SZ-30	393.84	DMSO	25	mg/ml	63.4776	mM	N-(3-(aminosulfonyl)phenyl)-1-(4-chlorophenyl)-5-oxopyrrolidine-3-carboxamide
B No 28	SZ-013B	429.32	DMSO	25	mg/ml	58.2316	mM	1-(4-chlorophenyl)-4-(5-(4-chlorophenyl)[1,3]thiazolo[3,2-b][1,2,4]triazol-2-yl)pyrrolidin-2-one
B No 29	SZ-014B	412.87	DMSO	25	mg/ml	60.5517	mM	1-(4-chlorophenyl)-4-(5-(4-fluorophenyl)[1,3]thiazolo[3,2-b][1,2,4]triazol-2-yl)pyrrolidin-2-one
B No 30	SZ-015B	439.05	DMSO	30	mg/ml	68.3293	mM	1-(4-chlorophenyl)-4-(5-(4-nitrophenyl)[1,3]thiazolo[3,2-b][1,2,4]triazol-2-yl)pyrrolidin-2-one
