# Supplementary material for: Screening of Small-Molecule Libraries Using SARS-CoV-2-Derived Sequences Identifies Novel Furin Inhibitors
Source: Int J Mol Sci. 2024 May 7;25(10):5079. doi: 10.3390/ijms25105079 (PMC11121672; doi:10.3390/ijms25105079)
Supplement: Supplementary file 1 [file ijms-25-05079-s001.zip › Table S2.xlsx]

## Sheet: Povilas library HITS
				Povilas library
				ID	Compound	<50%	<75%
				P1	3-((2-mercaptophenyl)amino)propanoic acid		75.6819
				P2	3-((3-chloro-4-methylphenyl)(4,9-dioxo-4,9-dihydronaphtho[2,3-d]thiazol-2-yl)amino)propanoic acid	39.5017
				P3	3-((5-((5-bromothiophen-2-yl)methylene) -4-oxo-4,5-dihydrothiazol-2-yl)(3-chloro-4-methylphenyl)amino)propanoic acid	37.6039
				P4	3-(3-nitro-6,11-dioxo-6,11-dihydro-12H-benzo [b]phenoxazin-12-yl)propanoic acid		72.479
				P5	3-((5-chloro-2-methylphenyl)(4,9-dioxo-4,9-dihydronaphtho[2,3-d]thiazol-2-yl)amino)propanoic acid		57.5324
				P6	3-((4-hydroxyphenyl)amino)-N'-phenylpropanehydrazide		69.9881
				P7	3-((4-chlorophenyl)(5-(4-(dimethylamino)benzylidene)-4-oxo-4,5-dihydrothiazol-2-yl)amino)propanoic acid		52.5505
				P9	3-((4-chlorophenyl)(4,9-dioxo-4,9-dihydronaphtho[2,3-d]thiazol-2-yl)amino)propanoic acid		57.6512
				P11	3-((2-methyl-4-nitrophenyl)amino)propanoic acid		80.9012
				P12	1-(3-((2-methyl-5-nitrophenyl)amino) propanamido)-5-oxopyrrolidine-3-carboxylic acid	47.9239
				P13	ethyl 3-(2-nitro-6,11-dioxo-6,11-dihydro-12H-benzo[b] phenoxazin-12-yl)but-2-enoate	41.0438
				P14	3-((2-hydroxyphenyl)amino)- N'-(thiophen-2-ylmethylene)butanehydrazide		59.1932
				P15	3-((5-benzylidene-4-oxo-4,5-dihydrothiazol-2-yl) (3-chloro-4-methylphenyl)amino)propanoic acid		50.1779
				P16	3-((3-chloro-4-methylphenyl) (4-oxo-5-(thiophen-2-ylmethylene)-4,5-dihydrothiazol-2-yl)amino)propanoic acid	49.229
				P17	((3-(1-(4-chlorophenyl)-5-oxopyrrolidin-3-yl) -1H-1,2,4-triazol-5-yl)sulfanyl)-N'-(phenylmethylidene)ethanehydrazide	46.6193
				P18	N-(2,5-dimethyl-1H-pyrrol-1-yl) -3-((4-hydroxyphenyl)amino)propanamide	28.3511
					6-nitro-2,3-dihydroquinolin-4(1H)-one		51.9574
					3-((3-chloro-4-methylphenyl)(5-(furan-2-ylmethylene)-4-oxo-4,5-dihydrothiazol-2-yl)amino)propanoic acid		52.9063
					1-(4-chlorophenyl)-4-(5-( (2-oxo-2-phenylethyl)sulfanyl)-1H-1,2,4-triazol-3-yl)pyrrolidin-2-one		54.3296
					N'-((9-ethyl-9H-carbazol-3-yl)methylene)-5-oxo-1-(p-tolyl)pyrrolidine-3-carbohydrazide		56.1091
					6-methyl-7-nitro-3,4-dihydro-2H-benzo [b][1,4]oxazine		57.7699
					3-((4-hydroxyphenyl)amino)butanehydrazide		59.9051
					sodium 3-((3-cinnamoylphenyl) amino)propanoate		60.4983
					((3-(1-(4-chlorophenyl)-5-oxopyrrolidin-3-yl) -1H-1,2,4-triazol-5-yl)sulfanyl)ethanehydrazide		60.854
					9-chloro-2,3,5,6-tetrahydro-1H,7H-pyrido [3,2,1-ij]quinoline-1,7-dione		62.6335
					4-(((9H-fluoren-9-ylidene)hydrazono) methyl)-N,N-diethylaniline		62.7518
					1-(4-chlorophenyl)-4-(5-((2-((2,5-dimethyl-1H-pyrrol-1-yl) amino)-2-oxoethyl)sulfanyl)-1H-1,2,4-triazol-3-yl)pyrrolidin-2-one		63.108
					4-(1-(2,2-diphenylhydrazono) ethyl)-N,N-diethylaniline		63.2267
					((3-(1-(4-chlorophenyl)-5-oxopyrrolidin-3-yl) -1H-1,2,4-triazol-5-yl)sulfanyl)-N'-(4-nitrophenyl)methylidene)ethanehydrazide		64.5313
					N'-(4-(dimethylamino)benzylidene)-3-((2-methoxy-4-nitrophenyl)amino)propanehydrazide		65.0057
					(E)-3-((4-hydroxyphenyl)amino)-N' -(thiophen-2-ylmethylene)propanehydrazide		65.4802
					1-(2-hydroxyphenyl)-5-methyldihydropyrimidine -2,4(1H,3H)-dione		67.7341
					3-((5-chloro-2-hydroxyphenyl)amino) butanoic acid		67.8529
					(E)-3-((4-hydroxyphenyl)amino)- N'-((5-nitrothiophen-2-yl)methylene)propanehydrazide		68.0899
					1-(4-(1-hydrazonoethyl)phenyl) -5-oxopyrrolidine-3-carbohydrazide		68.5647
					1-(4-chlorophenyl)-4-(5-((2-(4-nitrophenyl) -2-oxoethyl)sulfanyl)-1H-1,2,4-triazol-3-yl)pyrrolidin-2-one		69.9881
					3,3'-((4-hydroxyphenyl)azanediyl) bis(N'-((E)-4-chlorobenzylidene)propanehydrazide)		70.1068
					3-(3-methyl-1-(naphthalen-1-yl) ureido)propanoic acid		71.1744
					4-((4-chlorophenyl)amino)-N'-((E)- (4-methoxyphenyl)methylidene)-3-(6-methyl-1H-benzimidazol-2-yl)butanehydrazide		71.2927
					6-(4-oxo-2-thioxotetrahydropyrimidin-1(2H)-yl)benzo[d]oxazol-2(3H)-one		71.4114
					1-(4-(phenyldiazenyl)phenyl) dihydropyrimidine-2,4(1H,3H)-dione		71.7676
					3-((3-chloro-4-methylphenyl)(5-(4-nitrobenzylidene)-4-oxo-4,5-dihydrothiazol-2-yl)amino)propanoic acid		72.3603
					(E)-N'-benzylidene-3-((4-hydroxyphenyl) amino)-2-methylpropanehydrazide		72.7165
					1-(4-chlorophenyl)-4-(5-(4-fluorophenyl) [1,3]thiazolo[3,2-b][1,2,4]triazol-2-yl)pyrrolidin-2-one		72.8352
					1-(2-methoxy-4-nitrophenyl)dihydropyrimidine -2,4(1H,3H)-dione		73.5467
					1-(2,6-dimethylphenyl) dihydropyrimidine-2,4(1H,3H)-dione		73.9028
					3-(2-oxo-2,3-dihydro-1H-benzo [d]imidazol-1-yl)propanoic acid		74.1398
					3-((4-bromophenyl)amino)-N'- (4-nitrobenzylidene)propanehydrazide		74.2585
					3-((4-hydroxyphenyl)amino)- N'-(4-methoxybenzylidene)propanehydrazide		74.3773
					(E)-3-((4-hydroxyphenyl)amino) -N'-(4-methoxybenzylidene)butanehydrazide		74.4956
					2,2,6,6-tetramethyl-N-(4-nitrophenyl) piperidin-4-amine		74.6143

## Sheet: p value
		Library	Compounds	<50%	significance	p value
		Phytochem
			Dihydroergocristine mesylate	44.5249	No	0.5708
			3,3'-methylene-bis(4-hydroxycoumarin)	40.5578	No	0.4097
			2'-Hydroxy-4'-Methoxyacetophenone	47.7053	No	0.4673
			Quinine dihydrochloride	48.4223	No	0.4668
		Povilas
		P2	3-((3-chloro-4-methylphenyl)(4,9-dioxo-4,9-dihydronaphtho[2,3-d]thiazol-2-yl)amino)propanoic acid	39.5017	**	0.0091
		P3	3-((5-((5-bromothiophen-2-yl)methylene) -4-oxo-4,5-dihydrothiazol-2-yl)(3-chloro-4-methylphenyl)amino)propanoic acid	37.6039	****	< 0.0001
		P13	ethyl 3-(2-nitro-6,11-dioxo-6,11-dihydro-12H-benzo[b] phenoxazin-12-yl)but-2-enoate	41.0438	**	0.0069
		P16	3-((3-chloro-4-methylphenyl) (4-oxo-5-(thiophen-2-ylmethylene)-4,5-dihydrothiazol-2-yl)amino)propanoic acid	49.229	**	0.0012
		P18	N-(2,5-dimethyl-1H-pyrrol-1-yl) -3-((4-hydroxyphenyl)amino)propanamide	28.3511	*	0.0452
